# Supplementary material for: Drugs targeting the JAK/STAT pathway for the treatment of immune-mediated inflammatory skin diseases: protocol for a scoping review
Source: PubMed Central journal article supplement — BMJ Open. 2019 May 22;9(5):e028303. doi: 10.1136/bmjopen-2018-028303 (PMC6538201; doi:10.1136/bmjopen-2018-028303), 2019-05-22
Supplement: bmjopen-2018-028303.draft_revisions.pdf [file bmjopen-2018-028303.draft_revisions.pdf]

# BMJ Open

BMJ Open is committed to open peer review. As part of this commitment we make the peer review history of every article we publish publicly available.

When an article is published we post the peer reviewers' comments and the authors' responses online. We also post the versions of the paper that were used during peer review. These are the versions that the peer review comments apply to.

The versions of the paper that follow are the versions that were submitted during the peer review process. They are not the versions of record or the final published versions. They should not be cited or distributed as the published version of this manuscript.

BMJ Open is an open access journal and the full, final, typeset and author-corrected version of record of the manuscript is available on our site with no access controls, subscription charges or pay-per-view fees (<http://bmjopen.bmj.com>).

If you have any questions on BMJ Open's open peer review process please email [info.bmjopen@bmj.com](mailto:info.bmjopen@bmj.com)

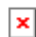

**Drugs targeting the JAK/STAT pathway for the treatment of immune-mediated inflammatory skin diseases: protocol for a scoping review**

|                               |                                                                                                                                                                                                                                                                                                                                                                                                                                                                                                                                                                                                                                                                                                                                                                                                                                                                                                                                                                                                                                                                                                                                                                                                                                                                                                                                                                                                                                                                                                                                                                                                                                                                                                                                                                                                                               |
|-------------------------------|-------------------------------------------------------------------------------------------------------------------------------------------------------------------------------------------------------------------------------------------------------------------------------------------------------------------------------------------------------------------------------------------------------------------------------------------------------------------------------------------------------------------------------------------------------------------------------------------------------------------------------------------------------------------------------------------------------------------------------------------------------------------------------------------------------------------------------------------------------------------------------------------------------------------------------------------------------------------------------------------------------------------------------------------------------------------------------------------------------------------------------------------------------------------------------------------------------------------------------------------------------------------------------------------------------------------------------------------------------------------------------------------------------------------------------------------------------------------------------------------------------------------------------------------------------------------------------------------------------------------------------------------------------------------------------------------------------------------------------------------------------------------------------------------------------------------------------|
| Journal:                      | <i>BMJ Open</i>                                                                                                                                                                                                                                                                                                                                                                                                                                                                                                                                                                                                                                                                                                                                                                                                                                                                                                                                                                                                                                                                                                                                                                                                                                                                                                                                                                                                                                                                                                                                                                                                                                                                                                                                                                                                               |
| Manuscript ID                 | bmjopen-2018-028303                                                                                                                                                                                                                                                                                                                                                                                                                                                                                                                                                                                                                                                                                                                                                                                                                                                                                                                                                                                                                                                                                                                                                                                                                                                                                                                                                                                                                                                                                                                                                                                                                                                                                                                                                                                                           |
| Article Type:                 | Protocol                                                                                                                                                                                                                                                                                                                                                                                                                                                                                                                                                                                                                                                                                                                                                                                                                                                                                                                                                                                                                                                                                                                                                                                                                                                                                                                                                                                                                                                                                                                                                                                                                                                                                                                                                                                                                      |
| Date Submitted by the Author: | 03-Dec-2018                                                                                                                                                                                                                                                                                                                                                                                                                                                                                                                                                                                                                                                                                                                                                                                                                                                                                                                                                                                                                                                                                                                                                                                                                                                                                                                                                                                                                                                                                                                                                                                                                                                                                                                                                                                                                   |
| Complete List of Authors:     | <p>Gomez-Garcia, Francisco; Hospital Universitario Reina Sofia, Dermatology; Instituto Maimonides de Investigacion Biomedica de Cordoba (IMIBIC)/Hospital Universitario Reina Sofia/Universidad de Cordoba</p> <p>Gomez-Arias, Pedro Jesus; Hospital Universitario Reina Sofia, Dermatology; Instituto Maimonides de Investigacion Biomedica de Cordoba (IMIBIC)/Hospital Universitario Reina Sofia/Universidad de Cordoba</p> <p>Hernandez, Jorge; Hospital Universitario Reina Sofia, Pharmacy</p> <p>Montilla, Ana Maria; Instituto Maimonides de Investigacion Biomedica de Cordoba (IMIBIC)/Hospital Universitario Reina Sofia/Universidad de Cordoba; University of Cordoba, School of Medicine</p> <p>Gay-Mimbrera, Jesús; Instituto Maimonides de Investigacion Biomedica de Cordoba (IMIBIC)/Hospital Universitario Reina Sofia/Universidad de Cordoba</p> <p>Aguilar-Luque, Macarena; Instituto Maimonides de Investigacion Biomedica de Cordoba (IMIBIC)/Hospital Universitario Reina Sofia/Universidad de Cordoba</p> <p>Viguera-Guerra, Isabel; Instituto Maimonides de Investigacion Biomedica de Cordoba (IMIBIC)/Hospital Universitario Reina Sofia/Universidad de Cordoba</p> <p>Velez Garcia-Nieto, Antonio; Hospital Universitario Reina Sofia, Dermatology; Instituto Maimonides de Investigacion Biomedica de Cordoba (IMIBIC)/Hospital Universitario Reina Sofia/Universidad de Cordoba</p> <p>Isla-Tejera, Beatriz; Hospital Universitario Reina Sofia, Pharmacy; Instituto Maimonides de Investigacion Biomedica de Cordoba (IMIBIC)/Hospital Universitario Reina Sofia/Universidad de Cordoba</p> <p>Ruano, Juan; Hospital Universitario Reina Sofia, Dermatology; Instituto Maimonides de Investigacion Biomedica de Cordoba (IMIBIC)/Hospital Universitario Reina Sofia/Universidad de Cordoba</p> |
| Keywords:                     | Protocol, scoping review, JAK/STAT pathway, immune-mediated inflammatory skin diseases, PRISMA                                                                                                                                                                                                                                                                                                                                                                                                                                                                                                                                                                                                                                                                                                                                                                                                                                                                                                                                                                                                                                                                                                                                                                                                                                                                                                                                                                                                                                                                                                                                                                                                                                                                                                                                |

SCHOLARONE™  
Manuscripts

1 Protocol

2 **BMJ Open**

3 **Title:** Drugs targeting the JAK/STAT pathway for the treatment of immune-  
4 mediated inflammatory skin diseases: protocol for a scoping review

5 **Short title:** Scoping review of JAK/STAT blockade in dermatology

6 **Authors:**

7 Francisco Gomez-Garcia, MD, PhD<sup>1,2,#</sup>, fjpgg79@gmail.com

8 Pedro Jesus Gomez-Arias, MD<sup>1,2</sup>, pedrojesusgomezarias@gmail.com

9 Jorge Hernandez, PharmD<sup>4</sup>, jorge.hernandez.sspa@juntadeandalucia.es

10 Ana Maria Montilla, MS<sup>2,3</sup>, h32moloa@uco.es

11 Jesús Gay-Mimbrera, BSc<sup>2</sup>, gaymimbrera@gmail.com

12 Macarena Aguilar-Luque, BSc<sup>2</sup>, b82aglum@uco.es

13 Isabel Viguera-Guerra, PharmD<sup>2</sup>, isabelvigue@gmail.com

14 Antonio Velez Garcia-Nieto, MD, PhD<sup>1,2</sup>; avelez108@gmail.com

15 Beatriz Isla-Tejera, PharmD, PhD<sup>2,4</sup>, beatrizislatj@gmail.com

16 Juan Ruano, MD, PhD<sup>1,2,#,\*</sup>, juanruanoruiz@mac.com

17 **Author affiliations:**

18 <sup>1</sup> Department of Dermatology, Hospital Universitario Reina Sofia, Cordoba,  
19 Spain

- 1  
2  
3  
4  
5 20 <sup>2</sup> Instituto Maimonides de Investigacion Biomedica de Cordoba  
6  
7  
8 21 (IMIBIC)/Hospital Universitario Reina Sofía/Universidad de Cordoba, Cordoba,  
9  
10 22 Spain  
11  
12  
13 23 <sup>3</sup> School of Medicine, University of Cordoba, Cordoba, Spain  
14  
15 24 <sup>4</sup> Department of Pharmacy, Hospital Universitario Reina Sofia, Cordoba, Spain  
16  
17  
18  
19 25 #Contributed equally to this work.  
20  
21  
22 26 **\*Corresponding author:** Juan Ruano, Instituto Maimonides de Investigacion  
23  
24 27 Biomedica de Cordoba, 14004, Cordoba, Spain. Phone: +34 606 88 7057  
25  
26 28 E-mail: [juanruanoruiz@mac.com](mailto:juanruanoruiz@mac.com)  
27  
28  
29 29 **World count:** 1,450; **Tables:** 1; **Figures:** 0.  
30  
31  
32  
33  
34  
35  
36  
37  
38  
39  
40  
41  
42  
43  
44  
45  
46  
47  
48  
49  
50  
51  
52  
53  
54  
55  
56  
57  
58  
59  
60

1  
2  
3  
4  
5  
6  
7  
8  
9  
10  
11  
12  
13  
14  
15  
16  
17  
18  
19  
20  
21  
22  
23  
24  
25  
26  
27  
28  
29  
30  
31  
32  
33  
34  
35  
36  
37  
38  
39  
40  
41  
42  
43  
44  
45  
46  
47  
48  
49  
50  
51  
52  
53  
54  
55  
56  
57  
58  
59  
60

30 **ABSTRACT**

31 **Introduction.** The JAK/STAT pathway is known to be involved in inflammatory  
32 and neoplastic skin diseases, like psoriasis, atopic dermatitis, alopecia areata,  
33 vitiligo, and melanoma. Improved knowledge of the components of this pathway  
34 has allowed the development of drugs, which act by inhibiting the pathway,  
35 blocking specific components. This offers new therapeutic opportunities.  
36 Although evidence on the use of JAK/STAT blockades in dermatological  
37 diseases is growing, none have been approved for use in treating skin diseases.  
38 The aim of this study is to develop an *a priori* protocol to broadly review the  
39 available evidence on the use of drugs targeting the JAK/STAT pathway in the  
40 treatment of dermatological diseases.

41 **Methods and analysis.** For the conduction of the scoping review protocol, we  
42 will employ an established scoping review methodology described in the Joanna  
43 Briggs Institute manual. This methodology outlines a 5-stage approach: 1) identify  
44 the research question; 2) identify relevant studies; 3) select studies; 4) chart the data;  
45 and 5) collate, summarize, and report the results, with an optional consultation exercise.  
46 Finally, we used the Preferred Reporting Items for Systematic Reviews and Meta-  
47 Analyses (PRISMA) Extension for Scoping Reviews (PRISMA-ScR) to present the  
48 results.

49 **Ethics and dissemination.** Since this is a review of the literature, ethics approval is  
50 not indicated. We will disseminate the findings from this study in publications in peer-  
51 reviewed journals as well as presentations at relevant national and international conferences.

52 **Keywords:** Protocol; scoping review; JAK/STAT pathway; immune-mediated  
53 inflammatory skin diseases; PRISMA.

1  
2  
3  
4  
5  
6  
7  
8  
9  
10  
11  
12  
13  
14  
15  
16  
17  
18  
19  
20  
21  
22  
23  
24  
25  
26  
27  
28  
29  
30  
31  
32  
33  
34  
35  
36  
37  
38  
39  
40  
41  
42  
43  
44  
45  
46  
47  
48  
49  
50  
51  
52  
53  
54  
55  
56  
57  
58  
59  
60  
61  
62  
63  
64  
65

## 54 **Article summary**

### 55 **Strengths and limitations of this study**

56 ▪ Strengths of this study include the importance of unrevealing uncertainty about  
57 evidence of using drugs targeting JAK/STAT pathway when prescribed as  
58 *off-label* for dermatological diseases in the clinical setting.

59 ▪ We will use an established scoping review methodology, a systematic search  
60 developed by two health sciences librarians, and systematic screening and  
61 data abstraction carried out in duplicate.

62 ▪ A limitation of this review is the potential to miss relevant articles, especially in  
63 the grey literature. To mitigate this, we will screen meeting abstracts to  
64 identify any missed articles describing case reports not published in journals  
65 and scanning reference lists of included articles and similar reviews.

## 66 INTRODUCTION

67 Improving knowledge of the molecular biology of the cell, and its adaptation to  
68 the disease pathogenesis, have allowed the design of new drugs directed  
69 against key targets in signaling pathway regulation. In this sense, the Janus  
70 kinases (JAKs) and Signal Transducer and Activator of Transcription (STATs)  
71 proteins (JAK/STAT) pathway is one of a handful of pleiotropic routes used to  
72 transduce multiple extracellular signals involved in cell proliferation,  
73 differentiation, migration, and apoptosis.<sup>1</sup> Alterations in the regulation of this  
74 process have been associated with pathological events fundamentally related to  
75 immunomodulatory and neoplastic (mainly hematological) disorders. In addition,  
76 they have been related to the pathophysiology of several dermatological  
77 diseases. Therefore, drugs that act on the JAK/STAT pathway represent an  
78 opportunity for the treatment of these disorders.<sup>2</sup>

79 The JAK family is comprised by four types of cytoplasmic tyrosine kinases:  
80 JAK1, JAK2, JAK3, and Tyk2.<sup>3</sup> STAT, of which there are seven different  
81 subtypes (STAT1, STAT2, STAT3, STAT4, STAT5a, STAT 5b, and STAT6), is  
82 the other fundamental component of the cascade<sup>4</sup>. After being phosphorylated  
83 by JAK, STAT translocates to the nucleus to induce the transcription of specific  
84 genes. Different types of ligands, from cytokines, such as interleukins (IL), to  
85 hormones, such as erythropoietin, activate this pathway to produce changes in  
86 the cell, and eventually in tissue physiology. Some of these molecules have  
87 been shown to be important, directly or indirectly, in the development of  
88 dermatological diseases. Examples of these are IL-2 and its family, IL-23,  
89 interferon alpha,<sup>5</sup> and IL-17.<sup>6</sup> The overall pathway has shown its implication in

1  
2  
3  
4  
5 90 the pathophysiology of diseases such as psoriasis, atopic dermatitis, lupus  
6  
7  
8 91 erythematous, melanoma, or pyoderma gangrenosum.<sup>7</sup>  
9

10  
11 92 This knowledge has led to the development of drugs that act on the JAK  
12  
13 93 component of the pathway, by selectively inhibiting one (filgotinib, JAK1;  
14  
15 94 pacritinib, JAK2; decernotinib, JAK3) or more than one (tofacitinib, JAK1 y JAK3;  
16  
17 95 ruxolitinib, baricitinib, JAK1 and JAK2) JAK protein.<sup>8</sup> Ruxolitinib and tofacinib  
18  
19 96 were the first drugs of this class to be approved by the FDA – in 2011 for  
20  
21 97 myelofibrosis and in 2012 for rheumatoid arthritis, respectively.<sup>9,10</sup>  
22  
23  
24

25 98 So far, no JAK/STAT inhibitors have been approved a license for the treatment  
26  
27 99 of dermatological diseases. However, evidence exists resulting from the off-  
28  
29 100 label use of these drugs, specifically tofacitinib and ruxolitinib, in different skin  
30  
31 101 diseases. Knowing the efficacy and safety profile of each drug used in different  
32  
33 102 dermatological diseases is essential to establish their risk-benefit balance.  
34  
35

36 103

37  
38 104 Improving knowledge requires ordering evidence, establishing gaps in the  
39  
40 105 evidence, and formulating questions that can be answered using systematic  
41  
42 106 synthesis and analysis techniques. The aim of this is to develop guidelines that  
43  
44 107 give support to physicians in making effective decisions in clinical practice. For  
45  
46 108 this purpose, secondary scientific studies can develop methodologies that adapt  
47  
48 109 to the specific needs of the formulated problem. The application of JAK  
49  
50 110 inhibitors for the treatment of dermatological disorders is still in its early stages,  
51  
52 111 and we consider it necessary to broadly review the knowledge available to date.  
53  
54 112 Otherwise, the conduction of studies aimed at answering specific questions can  
55  
56 113 lead to synthesis efforts that cannot be quantified.<sup>11</sup>  
57  
58  
59  
60



1  
2  
3  
4  
5 114  
6  
7

8 115 A scope review is a form of scientific synthesis that addresses an exploratory  
9  
10 116 research question, with the aim of mapping key concepts and gaps in research  
11  
12 117 related to a defined area or field.<sup>12</sup> The aim of this protocol was to define the  
13  
14 118 methodology that will be used to broadly synthesize the available evidence on  
15  
16  
17 119 the use of inhibitors of the JAK/STAT pathway in dermatological diseases.  
18

19 120  
20

21 121  
22

23 122  
24  
25  
26  
27  
28  
29  
30  
31  
32  
33  
34  
35  
36  
37  
38  
39  
40  
41  
42  
43  
44  
45  
46  
47  
48  
49  
50  
51  
52  
53  
54  
55  
56  
57  
58  
59  
60

## 123 **METHODS**

### 124 **Protocol design**

125 The aim of the study is to broadly address the published evidence on drugs  
126 targeting JAK proteins in the treatment dermatological diseases, for three  
127 purposes: a) to structure the existing knowledge in this field; b) to establish  
128 areas where there may be gaps in the evidence; c) to formulate new questions  
129 that can be answered following the methodology of systematic reviews. With  
130 this intention, we used the methodology recently described to conduct scoping  
131 reviews.<sup>13</sup> This methodology outlines a 5-stage approach (**Table 1**): 1) identify  
132 the research question; 2) identify relevant studies; 3) select studies; 4) chart the  
133 data; and 5) collate, summarize, and report the results, with an optional  
134 consultation exercise. Finally, we used the Preferred Reporting Items for  
135 Systematic Reviews and Meta-Analyses (PRISMA) Extension for Scoping  
136 Reviews (PRISMA-ScR) to present the results.<sup>14</sup>

137

### 138 **Inclusion criteria**

139 We will use PCC (participants, concept, context) mnemotechnic rule to define  
140 the inclusion criteria as follows:

141

### 142 **Participants**

143 All studies that include evidence on the use of JAK protein inhibitors in humans  
144 will be included. No restrictions regarding age, ethnicity, study design, or any  
145 other characteristics will be made.

146

### 147 **Concept**

1  
2  
3  
4  
5  
6 148 We will review the existing literature on drugs targeting JAKs proteins in the  
7  
8 149 treatment of dermatological diseases: indications, epidemiology, genetics,  
9  
10 150 efficacy and safety.

11  
12 151

### 13 14 152 **Context**

15  
16  
17 153 We will not limit the context to a particular setting or country.

18  
19 154

### 20 21 155 **Research question**

22  
23  
24 156 What are the indications, epidemiology, genetics, efficacy, and safety of drugs  
25  
26 157 targeting proteins of STAT/JAK pathway for the treatment of dermatological  
27  
28 158 diseases?

29  
30  
31 159

### 32 33 160 **Identifying relevant literature**

34  
35 161 We will perform a three-step literature search. The first step will include an initial  
36  
37 162 limited search of the MEDLINE and EMBASE databases. Then, we will carry  
38  
39 163 out analyses of: the text contained in the titles, abstracts of retrieved papers,  
40  
41  
42 164 and the index terms used to describe the articles. In second step, we will search  
43  
44 165 the same databases using the identified key words and index terms. Thirdly, the  
45  
46 166 reference list of all identified reports and articles will be searched for additional  
47  
48  
49 167 studies. We will contact authors of primary studies or reviews for further  
50  
51 168 information, if relevant. We will include all studies published in English until  
52  
53 169 October 2018. The process will be carried out by at least two researchers.

54  
55  
56 170

### 57 58 171 **Identifying relevant studies.**

59  
60

1  
2  
3  
4  
5 172 We will apply the inclusion criteria, described previously, for the selection of  
6  
7  
8 173 studies. The process will be carried out by at least two researchers.  
9

10 174

11  
12 175 **Charting the data.**

13  
14 176 We will develop a draft charting to record the information that will be relevant to  
15  
16  
17 177 the review.

18  
19 178 Questions focusing on:

20  
21 179 *1) Mapping studies:* Author(s), Year of publication, origin/country of origin  
22  
23 180 (where the study was published or conducted), authors filiation, type of study, a  
24  
25 181 priori design, registration, conflict of interest, funding;

26  
27 182 *2) Epidemiological and genetics aspects:* Study population and sample size,  
28  
29 183 genetic studies;

30  
31 184 *3) Evaluation of the efficacy and safety of drugs for each disease:* Intervention  
32  
33 185 type, comparator and details of these, duration of the intervention, dosage,  
34  
35 186 outcomes and details of these and adverse events.

36  
37 187 The data collection will be done by at least two reviewers.  
38

39 188

40  
41  
42  
43  
44 189 **5. Collating, summarizing and reporting results**

45  
46 190 The elements of the PCC inclusion criteria will guide the presentation of the  
47  
48 191 data. Firstly, we will present the results of the search in the PRISMA flow chart.

49  
50 192 Secondly, we will organize the extracted data for topics defined as follows:

51  
52 193 indications, mechanism of action, efficacy safety and cost. For each category, a  
53  
54 194 clear explanation was provided. The results of the scoping review will be

55  
56 195 presented as a map, in both diagrammatic and tabular form, and in a descriptive  
57  
58  
59  
60

1  
2  
3  
4  
5 196 format. A narrative summary will accompany the tabulated and/or charted  
6  
7  
8 197 results and will describe how the results relate to the review objective and  
9  
10 198 question(s).

11  
12 199

## 13 14 200 **6. Differences between the protocol and the overview**

15  
16  
17 201 Changes in the methodology that need to be carried out throughout the study  
18  
19 202 will be detailed in the results section.

20  
21  
22 203

## 23 24 204 **Compliance with Ethics Guidelines**

25  
26 205 This protocol relates to a search for previously conducted studies, and does not  
27  
28 206 involve any new human or animal studies performed by the authors.

29  
30  
31 207

## 32 33 208 **Patient and Public Involvement**

34  
35 209 Patients and or public were not involved in the development of this protocol.

36  
37  
38 210

39  
40 211

41 212  
42  
43  
44  
45  
46  
47  
48  
49  
50  
51  
52  
53  
54  
55  
56  
57  
58  
59  
60

## 213 **CONCLUSION**

214 Here, we have presented a protocol for systematically conducting a scoping  
215 review to broadly analyze the available evidence on the indications for and the  
216 mechanisms of action, efficacy, and safety of JAK/STAT pathway-targeting  
217 drugs in the use of dermatological therapy. Evidence-based medicine is  
218 intended to optimize decision-making by emphasizing the use of evidence  
219 derived from well-designed and well-conducted research. Currently, most  
220 reviews of treatments blocking the JAK/STAT pathway are narrative reviews,  
221 which lack the necessary methodological detail to promote reproducibility and  
222 reduce the risk of bias.<sup>15,16</sup> Secondary research methodologies are constantly  
223 being developed and must be adapted to the type of research question being  
224 asked and the urgency with which the question must be answered.<sup>17</sup>

225 We believe that the scoping review methodology is the one of the best suited  
226 protocols to answer the question posed in this study. The results will provide  
227 unique insights into the available evidence on the use of JAK/STAT pathway-  
228 targeting drugs in the treatment of dermatological diseases, facilitating the  
229 detection of knowledge gaps and the identification of new questions to address  
230 via additional systematic reviews.

1  
2  
3  
4  
5 231 **ACKNOWLEDGEMENTS**

6  
7 232 **Funding.** This work was supported, in part, by project ICI1400136 (which  
8  
9 233 provided funding for J.R.), integrated into the National Plan of R+D+I 2008-  
10  
11 234 2011, co-financed by the ISCIII-Subdireccion General de Evaluacion and  
12  
13 235 European Regional Development Fund (ERDF), by project PIN-0316-2017-  
14  
15 236 Consejeria de Salud-Junta de Andalucia (J.R.). No funding was obtained from  
16  
17 237 any pharmaceutical company. The views expressed in this manuscript are  
18  
19 238 those of the authors and do not necessarily represent the views of the funders.  
20  
21

22  
23 239 **Authorship.** All named authors meet the International Committee of Medical  
24  
25 240 Journal Editors (ICMJE) criteria for authorship for this article, take responsibility  
26  
27 241 for the integrity of the work as a whole, and have given their approval for this  
28  
29 242 version to be published. The authors are also grateful to the reviewers for their  
30  
31 243 helpful comments and suggestions. We would also like to thank Editage  
32  
33 244 (www.editage.com) for performing English-language editing of this review.  
34  
35

36  
37 245 **Competing interests.** None declared.  
38

39  
40 246 **Provenance and peer review.** Not commissioned; externally peer reviewed.  
41

42  
43 247 **Compliance with Ethics Guidelines.** This protocol relates to a search for  
44  
45 248 previously conducted studies, and does not involve any new human or animal  
46  
47 249 subjects performed by the authors.  
48

49  
50 250 **Data sharing statement.** All the original data are presented in the text and  
51  
52 251 tables of the protocol.  
53

54  
55 252 **Contributors.** FGG and JR conceived the study. FGG, PJGA, JH, AMM, JGM, MAL,  
56  
57 253 IVP, AVGN, BIT, and JR contributed to the protocol design and plan. FGG, PJGA, and  
58  
59  
60

1  
2  
3  
4  
5 254 JH developed the literature search. All the authors worked collaboratively to draft and  
6  
7  
8 255 revise the manuscript, and read and approved the final version. All the authors made  
9  
10 256 substantive intellectual contributions to the development of this protocol.  
11  
12

13 257 **Open Access.** This is an Open Access article distributed in accordance with the  
14  
15 258 Creative Commons Attribution Non Commercial (CC BY-NC 4.0) license, which  
16  
17 259 permits others to distribute, remix, adapt, build upon this work non-commercially, and  
18  
19 260 license their derivative works on different terms, provided the original work is properly  
20  
21 261 cited and the use is non-commercial.  
22  
23  
24  
25

26 262  
27  
28

29 263  
30  
31

32 264  
33  
34

35 265  
36  
37  
38  
39  
40  
41  
42  
43  
44  
45  
46  
47  
48  
49  
50  
51  
52  
53  
54  
55  
56  
57  
58  
59  
60



266 **REFERENCES**

- 267 1. Jason S. Rawlings, Kristin M. Rosler, Douglas A. Harrison, The JAK/STAT  
268 signaling pathway. *Journal of Cell Science* 2004;117:1281-1283.
- 269 2. Samadi A, Ahmad Nasrollahi S, Hashemi A, Nassiri Kashani M, Firooz A.  
270 Janus kinase (JAK) inhibitors for the treatment of skin and hair disorders: a  
271 review of literature. *J Dermatolog Treat* 2017;28:476-483.
- 272 3. Seavey MM, Dobrzanski P. The many faces of Janus kinase. *Biochem*  
273 *Pharmacol* 2012;83:1136-1145.
- 274 4. Schwartz DM, Bonelli M, Gadina M, O'Shea JJ. Type I/II cytokines, JAKs,  
275 and new strategies for treating autoimmune diseases. *Nat Rev*  
276 *Rheumatol* 2016;12:25-36.
- 277 5. Damsky W, King BA. JAK inhibitors in dermatology: The promise of a new  
278 drug class. *J Am Acad Dermatol* 2017;76:736-744.
- 279 6. Ghoreschi K, Jesson MI, Li X, et al. Modulation of innate and adaptive  
280 immune responses by tofacitinib (CP-690,550). *J Immunol* 2011;186:4234-4243.
- 281 7. Palanivel JA, Macbeth AE, Chetty NC, Levell NJ. An insight into JAK-STAT  
282 signalling in dermatology. *Clin Exp Dermatol* 2014;39:513-8.
- 283
- 284 8. Welsch K, Holstein J, Laurence A, Ghoreschi K. Targeting JAK/STAT  
285 signalling in inflammatory skin diseases with small molecule inhibitors. *Eur J*  
286 *Immunol* 2017;47:1096-1107.
- 287
- 288 9. [https://investor.incyte.com/news-releases/news-release-details/fda-approves-](https://investor.incyte.com/news-releases/news-release-details/fda-approves-incytes-jakafitm-ruxolitinib-patients-myelofibrosis)  
289 [incytes-jakafitm-ruxolitinib-patients-myelofibrosis](https://investor.incyte.com/news-releases/news-release-details/fda-approves-incytes-jakafitm-ruxolitinib-patients-myelofibrosis)
- 290
- 291 10. Traynor K. FDA approves tofacitinib for rheumatoid arthritis. *Am J Health*  
292 *Syst Pharm* 2012;69:2120.
- 293

- 1  
2  
3  
4  
5 294 11. Shreberk-Hassidim R, Ramot Y, Zlotogorski A. Janus kinase inhibitors in  
6 295 dermatology: A systematic review. *J Am Acad Dermatol* 2017;76:745-753.e19.  
7  
8 296  
9  
10 297 12. Colquhoun HL, Levac D, O'Brien KK, Straus S, Tricco AC, Perrier L,  
11 298 Kastner M and Moher D. Scoping reviews: time for clarity in definition, methods,  
12 299 and reporting. *Journal of Clinical Epidemiology* 2014;67:1291-1294.  
13  
14 300  
15  
16 301 13. The Joanna Briggs Institute. The Joanna Briggs Institute reviewer's  
17 302 manual 2015. <http://joannabriggs.org/assets/docs/sumari/Reviewers->  
18 303 [Manual\\_Methodology-for-JBI-Scoping-Reviews\\_2015\\_v2.pdf](http://joannabriggs.org/assets/docs/sumari/Reviewers-). Accessed 29  
19 304 Sept 2016.  
20  
21 305  
22  
23 306 14. Tricco AC, Lillie E, Zarin W, O'Brien KK, et al. PRISMA extension for  
24 307 scoping reviews (PRISMA ScR): checklist and explanation. *Ann Intern Med*  
25 308 2018;169:467-473.  
26  
27 309  
28  
29 310 15. Yamaoka K, Saharinen P, Pesu M, Holt VE 3rd, Silvennoinen O, O'Shea JJ.  
30 311 The Janus kinases (Jaks). *Genome Biol* 2004;5:253.  
31  
32 312  
33 313 16. O'Shea JJ, Schwartz DM, Villarino AV, et al. The JAK-STAT pathway:  
34 314 impact on human disease and therapeutic intervention. *Annu Rev Med*  
35 315 2015;66:311-28.  
36  
37 316  
38  
39 317 17. Moher D, Stewart L, Shekelle P. All in the family: systematic reviews, rapid  
40 318 reviews, scoping reviews, realist reviews, and more. *Syst Rev* 2015;22:183.  
41  
42  
43  
44  
45  
46  
47  
48  
49  
50  
51  
52  
53  
54  
55  
56  
57  
58  
59  
60

319 **TABLES**320 **Table 1.-Stages of the scoping reviews.**

|                                 |                                      |                                                                                                                                                                                                               |
|---------------------------------|--------------------------------------|---------------------------------------------------------------------------------------------------------------------------------------------------------------------------------------------------------------|
| 1. Research Question Identified | 1.1. Overarching goal                | To explore the depth and breadth of evidence for the indications, epidemiology, genetics, efficacy and safety of drugs that act on JAK/STAT pathway in the treatment of patients with dermatological diseases |
|                                 | 1.2. Research question               | What are the indications, epidemiology, genetics, efficacy and safety of drugs that act on JAK/STAT pathway in the treatment of dermatological diseases?                                                      |
|                                 | 1.3. Purposes of this scoping review | 1.3.1. Review the evidence of indications for drugs that act on JAK/STAT pathway in the treatment of dermatological diseases                                                                                  |
|                                 |                                      | 1.3.2. Review the evidence of epidemiology of drugs acting on JAK/STAT pathway in the treatment of dermatological diseases                                                                                    |
|                                 |                                      | 1.3.3. Review the evidence of genetics of drugs acting on JAK/STAT pathway in the treatment of dermatological diseases                                                                                        |
|                                 |                                      | 1.3.4. Review the evidence on efficacy of the drugs that act on JAK/STAT pathway in the treatment of dermatological diseases                                                                                  |
|                                 |                                      | 1.3.5. Review the evidence on safety of drugs that act on JAK/STAT pathway in the treatment of dermatological diseases                                                                                        |

|                                           |                                                                                                                                                     |                                                                                                                                                                                               |
|-------------------------------------------|-----------------------------------------------------------------------------------------------------------------------------------------------------|-----------------------------------------------------------------------------------------------------------------------------------------------------------------------------------------------|
|                                           |                                                                                                                                                     | 1.3.6. Obtain concrete research questions that can be answered through a systematic review                                                                                                    |
|                                           |                                                                                                                                                     | 1.3.7. Identify research gaps in the existing literature                                                                                                                                      |
| <b>2. Identifying relevant literature</b> | 2.1. We will perform a three steps-search                                                                                                           | 2.1.1. First search: an initial limited search of the MEDLINE and EMBASE databases to find keywords in the title, abstract, and the index terms used to describe the articles                 |
|                                           |                                                                                                                                                     | 2.1.2. Second search: a search of MEDLINE and EMBASE using all identified keywords                                                                                                            |
|                                           |                                                                                                                                                     | 2.1.3. Third search: the reference lists of all identified reports and articles are searched for additional studies                                                                           |
|                                           | 2.2. We will include the studies published in full text in English until October 2018                                                               |                                                                                                                                                                                               |
|                                           | 2.3. We will contact authors, of primary studies or reviews, for further information, if this is relevant                                           |                                                                                                                                                                                               |
|                                           | 2.4. The search and selection will be done by at least two reviewers and in case of disagreement will be decided by agreement with a third reviewer |                                                                                                                                                                                               |
| <b>3. Selecting studies</b>               | 3.1. Inclusion criteria                                                                                                                             | 3.1.1. We will include in the review the studies on the human use of drugs inhibitors of JAK/STAT pathway published on the topics: indications, epidemiology, genetics, efficacy, and safety. |

|                                                        |                                                                                                                                                                            |                                                                                                                                                                         |
|--------------------------------------------------------|----------------------------------------------------------------------------------------------------------------------------------------------------------------------------|-------------------------------------------------------------------------------------------------------------------------------------------------------------------------|
|                                                        |                                                                                                                                                                            | 3.1.2. Design of the studies: we will include guidelines, systematic reviews, randomized clinical trials, observational studies, cross sectional case report and series |
|                                                        | 3.2. Exclusion criteria                                                                                                                                                    | 3.2.1. We will exclude narrative reviews and studies performed <i>in vitro</i> or using animal models                                                                   |
| <b>4. Charting the data</b>                            | 4.1. We will extract the data in a predefined form.                                                                                                                        |                                                                                                                                                                         |
|                                                        | 4.2. From each study we will extract title, objective, main variables related to patients, intervention, comparator, outcomes (efficacy and safety) and bibliographic data |                                                                                                                                                                         |
|                                                        | 4.3. We will classify the studies by treatment indication                                                                                                                  |                                                                                                                                                                         |
|                                                        | 4.4. The list of studies, variables and data of there view will be published in an online-file                                                                             |                                                                                                                                                                         |
|                                                        | 4.5. The data collection will be done by at least two reviewers and in case of disagreement will be decided by agreement with a third reviewer                             |                                                                                                                                                                         |
| <b>5. Collating, summarizing and reporting results</b> | 5.1. The results of comprehensive search will be presented using the PRISMA flow diagram                                                                                   |                                                                                                                                                                         |
|                                                        | 5.2. We will synthesize qualitatively the evidence obtained ordering it by topics: indications, mechanism of action, efficacy and safety of drugs that act on              |                                                                                                                                                                         |

|                                                             |                                                                                                                                          |  |
|-------------------------------------------------------------|------------------------------------------------------------------------------------------------------------------------------------------|--|
|                                                             | JAK/STAT pathway to treat dermatological diseases and we will present it in a diagrammatic tabular form and in a descriptive format      |  |
|                                                             | 5.3. We will use the extension of PRISMA for scoping review for the notification of the review                                           |  |
| <b>6. Differences between the protocol and the overview</b> | Any changes in the methodology that need to be carried out through out the study will be detailed together with the results publication. |  |

17 321

20 322

22 323

25 324

27 325

28 326

# BMJ Open

## Drugs targeting the JAK/STAT pathway for the treatment of immune-mediated inflammatory skin diseases: protocol for a scoping review

|                                 |                                                                                                                                                                                                                                                                                                                                                                                                                                                                                                                                                                                                                                                                                                                                                                                                                                                                                                                                                                                                                                                                                                                                                                                                                                                                                                                                                                                                                                                                                                                                                                                                                                                                                                                                                                                                                               |
|---------------------------------|-------------------------------------------------------------------------------------------------------------------------------------------------------------------------------------------------------------------------------------------------------------------------------------------------------------------------------------------------------------------------------------------------------------------------------------------------------------------------------------------------------------------------------------------------------------------------------------------------------------------------------------------------------------------------------------------------------------------------------------------------------------------------------------------------------------------------------------------------------------------------------------------------------------------------------------------------------------------------------------------------------------------------------------------------------------------------------------------------------------------------------------------------------------------------------------------------------------------------------------------------------------------------------------------------------------------------------------------------------------------------------------------------------------------------------------------------------------------------------------------------------------------------------------------------------------------------------------------------------------------------------------------------------------------------------------------------------------------------------------------------------------------------------------------------------------------------------|
| Journal:                        | <i>BMJ Open</i>                                                                                                                                                                                                                                                                                                                                                                                                                                                                                                                                                                                                                                                                                                                                                                                                                                                                                                                                                                                                                                                                                                                                                                                                                                                                                                                                                                                                                                                                                                                                                                                                                                                                                                                                                                                                               |
| Manuscript ID                   | bmjopen-2018-028303.R1                                                                                                                                                                                                                                                                                                                                                                                                                                                                                                                                                                                                                                                                                                                                                                                                                                                                                                                                                                                                                                                                                                                                                                                                                                                                                                                                                                                                                                                                                                                                                                                                                                                                                                                                                                                                        |
| Article Type:                   | Protocol                                                                                                                                                                                                                                                                                                                                                                                                                                                                                                                                                                                                                                                                                                                                                                                                                                                                                                                                                                                                                                                                                                                                                                                                                                                                                                                                                                                                                                                                                                                                                                                                                                                                                                                                                                                                                      |
| Date Submitted by the Author:   | 26-Feb-2019                                                                                                                                                                                                                                                                                                                                                                                                                                                                                                                                                                                                                                                                                                                                                                                                                                                                                                                                                                                                                                                                                                                                                                                                                                                                                                                                                                                                                                                                                                                                                                                                                                                                                                                                                                                                                   |
| Complete List of Authors:       | <p>Gomez-Garcia, Francisco; Hospital Universitario Reina Sofia, Dermatology; Instituto Maimonides de Investigacion Biomedica de Cordoba (IMIBIC)/Hospital Universitario Reina Sofia/Universidad de Cordoba</p> <p>Gomez-Arias, Pedro Jesus; Hospital Universitario Reina Sofia, Dermatology; Instituto Maimonides de Investigacion Biomedica de Cordoba (IMIBIC)/Hospital Universitario Reina Sofia/Universidad de Cordoba</p> <p>Hernandez, Jorge; Hospital Universitario Reina Sofia, Pharmacy</p> <p>Montilla, Ana Maria; Instituto Maimonides de Investigacion Biomedica de Cordoba (IMIBIC)/Hospital Universitario Reina Sofia/Universidad de Cordoba; University of Cordoba, School of Medicine</p> <p>Gay-Mimbrera, Jesús; Instituto Maimonides de Investigacion Biomedica de Cordoba (IMIBIC)/Hospital Universitario Reina Sofia/Universidad de Cordoba</p> <p>Aguilar-Luque, Macarena; Instituto Maimonides de Investigacion Biomedica de Cordoba (IMIBIC)/Hospital Universitario Reina Sofia/Universidad de Cordoba</p> <p>Viguera-Guerra, Isabel; Instituto Maimonides de Investigacion Biomedica de Cordoba (IMIBIC)/Hospital Universitario Reina Sofia/Universidad de Cordoba</p> <p>Velez Garcia-Nieto, Antonio; Hospital Universitario Reina Sofia, Dermatology; Instituto Maimonides de Investigacion Biomedica de Cordoba (IMIBIC)/Hospital Universitario Reina Sofia/Universidad de Cordoba</p> <p>Isla-Tejera, Beatriz; Hospital Universitario Reina Sofia, Pharmacy; Instituto Maimonides de Investigacion Biomedica de Cordoba (IMIBIC)/Hospital Universitario Reina Sofia/Universidad de Cordoba</p> <p>Ruano, Juan; Hospital Universitario Reina Sofia, Dermatology; Instituto Maimonides de Investigacion Biomedica de Cordoba (IMIBIC)/Hospital Universitario Reina Sofia/Universidad de Cordoba</p> |
| <b>Primary Subject Heading</b>: | Dermatology                                                                                                                                                                                                                                                                                                                                                                                                                                                                                                                                                                                                                                                                                                                                                                                                                                                                                                                                                                                                                                                                                                                                                                                                                                                                                                                                                                                                                                                                                                                                                                                                                                                                                                                                                                                                                   |
| Secondary Subject Heading:      | Immunology (including allergy), Pharmacology and therapeutics                                                                                                                                                                                                                                                                                                                                                                                                                                                                                                                                                                                                                                                                                                                                                                                                                                                                                                                                                                                                                                                                                                                                                                                                                                                                                                                                                                                                                                                                                                                                                                                                                                                                                                                                                                 |
| Keywords:                       | Protocol, scoping review, JAK/STAT pathway, immune-mediated inflammatory skin diseases, PRISMA                                                                                                                                                                                                                                                                                                                                                                                                                                                                                                                                                                                                                                                                                                                                                                                                                                                                                                                                                                                                                                                                                                                                                                                                                                                                                                                                                                                                                                                                                                                                                                                                                                                                                                                                |

1  
2  
3  
4  
5  
6  
7  
8  
9  
10  
11  
12  
13  
14  
15  
16  
17  
18  
19  
20  
21  
22  
23  
24  
25  
26  
27  
28  
29  
30  
31  
32  
33  
34  
35  
36  
37  
38  
39  
40  
41  
42  
43  
44  
45  
46  
47  
48  
49  
50  
51  
52  
53  
54  
55  
56  
57  
58  
59  
60

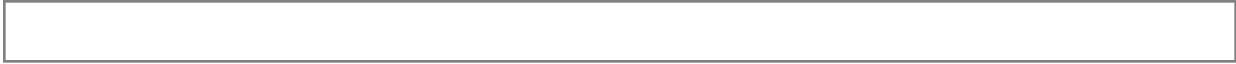

SCHOLARONE™  
Manuscripts



1 Protocol

2 **BMJ Open**

3 **Title:** Drugs targeting the JAK/STAT pathway for the treatment of immune-  
4 mediated inflammatory skin diseases: protocol for a scoping review

5 **Short title:** Scoping review of JAK/STAT blockade in dermatology

6 **Authors:**

7 Francisco Gomez-Garcia, MD, PhD<sup>1,2,#</sup>, fjpgg79@gmail.com

8 Pedro Jesus Gomez-Arias, MD<sup>1,2</sup>, pedrojesusgomezarias@gmail.com

9 Jorge Hernandez, PharmD<sup>4</sup>, jorge.hernandez.sspa@juntadeandalucia.es

10 Ana Maria Montilla, MS<sup>2,3</sup>, h32moloa@uco.es

11 Jesús Gay-Mimbrera, BSc<sup>2</sup>, gaymimbrera@gmail.com

12 Macarena Aguilar-Luque, BSc<sup>2</sup>, b82aglum@uco.es

13 Isabel Viguera-Guerra, PharmD<sup>2</sup>, isabelvigue@gmail.com

14 Antonio Velez Garcia-Nieto, MD, PhD<sup>1,2</sup>; avelez108@gmail.com

15 Beatriz Isla-Tejera, PharmD, PhD<sup>2,4</sup>, beatrizislatj@gmail.com

16 Juan Ruano, MD, PhD<sup>1,2,#,\*</sup>, juanruanoruiz@mac.com

17 **Author affiliations:**

18 <sup>1</sup> Department of Dermatology, Hospital Universitario Reina Sofia, Cordoba,  
19 Spain

- 1  
2  
3  
4  
5  
6 20 <sup>2</sup> Instituto Maimonides de Investigacion Biomedica de Cordoba  
7  
8 21 (IMIBIC)/Hospital Universitario Reina Sofía/Universidad de Cordoba, Cordoba,  
9  
10 22 Spain  
11  
12  
13 23 <sup>3</sup> School of Medicine, University of Cordoba, Cordoba, Spain  
14  
15 24 <sup>4</sup> Department of Pharmacy, Hospital Universitario Reina Sofia, Cordoba, Spain  
16  
17  
18  
19 25 #Contributed equally to this work.  
20  
21  
22 26 **\*Corresponding author:** Juan Ruano, Instituto Maimonides de Investigacion  
23  
24 27 Biomedica de Cordoba, 14004, Cordoba, Spain. Phone: +34 606 88 7057  
25  
26 28 E-mail: [juanruanoruiz@mac.com](mailto:juanruanoruiz@mac.com)  
27  
28  
29 29 **World count:** 1,450; **Tables:** 2; **Figures:** 0.  
30  
31  
32  
33  
34  
35  
36  
37  
38  
39  
40  
41  
42  
43  
44  
45  
46  
47  
48  
49  
50  
51  
52  
53  
54  
55  
56  
57  
58  
59  
60

**30 ABSTRACT**

31 **Introduction.** The JAK/STAT pathway is known to be involved in inflammatory  
32 and neoplastic skin diseases, like psoriasis, atopic dermatitis, alopecia areata,  
33 vitiligo, and melanoma. Improved knowledge of the components of this pathway  
34 has allowed the development of drugs, which act by inhibiting the pathway,  
35 blocking specific components. This offers new therapeutic opportunities.  
36 Although evidence on the use of JAK/STAT blockades in dermatological  
37 diseases is growing, none have been approved for use in treating skin diseases.  
38 The aim of this study is to develop an *a priori* protocol to broadly review the  
39 available evidence on the use of drugs targeting the JAK/STAT pathway in the  
40 treatment of dermatological diseases.

41 **Methods and analysis.** For the conduction of the scoping review protocol, we  
42 will employ an established scoping review methodology described in the Joanna  
43 Briggs Institute manual. This methodology outlines a 5-stage approach: 1) identify  
44 the research question; 2) identify relevant studies; 3) select studies; 4) chart the data;  
45 and 5) collate, summarize, and report the results, with an optional consultation exercise.  
46 Finally, we will use the Preferred Reporting Items for Systematic Reviews and Meta-  
47 Analyses (PRISMA) Extension for Scoping Reviews (PRISMA-ScR) to present the  
48 results.

49 **Ethics and dissemination.** Since this is a review of the literature, ethics approval is  
50 not indicated. We will disseminate the findings from this study in publications in peer-  
51 reviewed journals as well as presentations at relevant national and international  
52 conferences.

53 **Keywords:** Protocol; scoping review; JAK/STAT pathway; immune-mediated  
54 inflammatory skin diseases; PRISMA.

1  
2  
3  
4  
5  
6  
7  
8  
9  
10  
11  
12  
13  
14  
15  
16  
17  
18  
19  
20  
21  
22  
23  
24  
25  
26  
27  
28  
29  
30  
31  
32  
33  
34  
35  
36  
37  
38  
39  
40  
41  
42  
43  
44  
45  
46  
47  
48  
49  
50  
51  
52  
53  
54  
55  
56  
57  
58  
59  
60  
61  
62  
63  
64  
65  
66

## 55 **Article summary**

### 56 **Strengths and limitations of this study**

- 57 ▪ Strengths of this study include the importance of unrevealing uncertainty about  
58 evidence of using drugs targeting JAK/STAT pathway when prescribed as  
59 *off-label* for dermatological diseases in the clinical setting.
  
- 60 ▪ We will use an established scoping review methodology, a systematic search  
61 developed by two health sciences librarians, and systematic screening and  
62 data abstraction carried out in duplicate.
  
- 63 ▪ A limitation of this review is the potential to miss relevant articles, especially in  
64 the grey literature. To mitigate this, we will screen meeting abstracts to  
65 identify any missed articles describing case reports not published in journals  
66 and scan reference lists of included articles and similar reviews.

## 67 INTRODUCTION

68 Improving knowledge of the molecular biology of the cell, and its adaptation to  
69 the disease pathogenesis, have allowed the design of new drugs directed  
70 against key targets in signaling pathway regulation. In this sense, the Janus  
71 kinases (JAKs) and Signal Transducer and Activator of Transcription (STATs)  
72 proteins (JAK/STAT) pathway is one of a handful of pleiotropic routes used to  
73 transduce multiple extracellular signals involved in cell proliferation,  
74 differentiation, migration, and apoptosis.<sup>1</sup> Alterations in the regulation of this  
75 process have been associated with pathological events fundamentally related to  
76 immunomodulatory and neoplastic (mainly hematological) disorders. In addition,  
77 they have been related to the pathophysiology of several dermatological  
78 diseases. Therefore, drugs that act on the JAK/STAT pathway represent an  
79 opportunity for the treatment of these disorders.<sup>2</sup>

80 The JAK family is comprised by four types of cytoplasmic tyrosine kinases:  
81 JAK1, JAK2, JAK3, and Tyk2.<sup>3</sup> STAT, of which there are seven different  
82 subtypes (STAT1, STAT2, STAT3, STAT4, STAT5a, STAT 5b, and STAT6), is  
83 the other fundamental component of the cascade<sup>4</sup>. After being phosphorylated  
84 by JAK, STAT translocates to the nucleus to induce the transcription of specific  
85 genes. Different types of ligands, from cytokines, such as interleukins (IL), to  
86 hormones, such as erythropoietin, activate this pathway to produce changes in  
87 the cell, and eventually in tissue physiology. Some of these molecules have  
88 been shown to be important, directly or indirectly, in the development of  
89 dermatological diseases. Examples of these are IL-2 and its family, IL-23,  
90 interferon alpha,<sup>5</sup> and IL-17.<sup>6</sup> The overall pathway has shown its implication in

91 the pathophysiology of diseases such as psoriasis, atopic dermatitis, lupus  
92 erythematous, melanoma, or pyoderma gangrenosum.<sup>7</sup>

93 This knowledge has led to the development of drugs that act on the JAK  
94 component of the pathway, by selectively inhibiting one (filgotinib, JAK1;  
95 pacritinib, JAK2; decernotinib, JAK3) or more than one (tofacitinib, JAK1 and  
96 JAK3; ruxolitinib, baricitinib, JAK1 and JAK2) JAK protein.<sup>8</sup> Ruxolitinib and  
97 tofacitinib were the first drugs of this class to be approved by the FDA – in 2011  
98 for myelofibrosis and in 2012 for rheumatoid arthritis, respectively.<sup>9,10</sup>

99 So far, no JAK/STAT inhibitors have been approved a license for the treatment  
100 of dermatological diseases. However, evidence exists resulting from the off-  
101 label use of these drugs, specifically tofacitinib and ruxolitinib, in different skin  
102 diseases. Knowing the efficacy and safety profile of each drug used in different  
103 dermatological diseases is essential to establish their risk-benefit balance.

104

105 Improving knowledge requires ordering evidence, establishing gaps in the  
106 evidence, and formulating questions that can be answered using systematic  
107 synthesis and analysis techniques. The aim of this is to develop guidelines that  
108 give support to physicians in making effective decisions in clinical practice. For  
109 this purpose, secondary scientific studies can develop methodologies that adapt  
110 to the specific needs of the formulated problem. The application of JAK  
111 inhibitors for the treatment of dermatological disorders is still in its early stages,  
112 and we consider it necessary to broadly review the knowledge available to date.  
113 Otherwise, the conduction of studies aimed at answering specific questions can  
114 lead to synthesis efforts that cannot be quantified.<sup>11</sup>

1  
2  
3  
4  
5 115  
6  
7

8 116 A scope review is a form of scientific synthesis that addresses an exploratory  
9  
10 117 research question, with the aim of mapping key concepts and gaps in research  
11  
12 118 related to a defined area or field.<sup>12</sup> The aim of this protocol is to define the  
13  
14 119 methodology that will be used to broadly synthesize the available evidence on  
15  
16  
17 120 the use of inhibitors of the JAK/STAT pathway in dermatological diseases.  
18

19 121

20  
21 122

22  
23 123  
24  
25  
26  
27  
28  
29  
30  
31  
32  
33  
34  
35  
36  
37  
38  
39  
40  
41  
42  
43  
44  
45  
46  
47  
48  
49  
50  
51  
52  
53  
54  
55  
56  
57  
58  
59  
60

## 124 **METHODS**

### 125 **Protocol design**

126 The aim of the study is to broadly address the published evidence on drugs  
127 targeting JAK proteins in the treatment dermatological diseases, for three  
128 purposes: a) to structure the existing knowledge in this field; b) to establish  
129 areas where there may be gaps in the evidence; c) to formulate new questions  
130 that can be answered following the methodology of systematic reviews. With  
131 this intention, we will use the methodology recently described to conduct  
132 scoping reviews.<sup>13</sup> This methodology outlines a 5-stage approach (**Table 1**): 1)  
133 identify the research question; 2) identify relevant studies; 3) select studies; 4)  
134 chart the data; and 5) collate, summarize, and report the results, with an  
135 optional consultation exercise. Finally, we will use the Preferred Reporting Items  
136 for Systematic Reviews and Meta-Analyses (PRISMA) Extension for Scoping  
137 Reviews (PRISMA-ScR) to present the results.<sup>14</sup> This protocol is reported  
138 following the recommendations of the PRISMA for protocols (PRISMA-P)  
139 statement. A checklist for this review protocol has been provided in a  
140 Supplementary file.

141

### 142 **Inclusion criteria**

143 We will use PCC (participants, concept, context) mnemotechnic rule to define  
144 the inclusion criteria as follows:

145

### 146 **Participants**



1  
2  
3  
4  
5 147 All studies that include evidence on the use of JAK protein inhibitors in humans  
6  
7 148 will be included. No restrictions regarding age, ethnicity, study design, or any  
8  
9 149 other characteristics will be made.  
10  
11

12 150

13  
14  
15 151 **Concept**

16  
17 152 We will review the existing literature on drugs targeting JAK proteins in the  
18  
19 153 treatment of dermatological diseases: indications, epidemiology, genetics,  
20  
21 154 efficacy, and safety.  
22  
23

24 155

25  
26 156 **Context**

27  
28 157 We will not limit the context to a particular setting or country.  
29  
30

31 158

32  
33 159 **Research question**

34  
35 160 What are the indications, epidemiology, genetics, efficacy, and safety of drugs  
36  
37 161 targeting proteins of STAT/JAK pathway for the treatment of dermatological  
38  
39 162 diseases?  
40  
41

42 163

43  
44 164 **Identifying relevant literature**

45  
46 165 A systematic search developed by two health sciences librarians will perform  
47  
48 166 using a three-step literature search. The first step will include an initial limited  
49  
50 167 search of the MEDLINE and EMBASE databases (**Table 2**). Then, we will carry  
51  
52 168 out analyses of: the text contained in the titles, abstracts of retrieved papers,  
53  
54 169 and the index terms used to describe the articles. In second step, we will search  
55  
56 170 the same databases using the identified key words and index terms.  
57  
58  
59  
60

171 Additionally, CINAHL, Scopus, and Web of Science to the search engines will  
172 be searched in this second step. Thirdly, the reference list of all identified  
173 reports and articles will be searched for additional studies. We will contact  
174 authors of primary studies or reviews for further information, if relevant. We  
175 have established a time frame of four weeks after send authors a mail  
176 requesting information about their study or publication. We will include all  
177 studies published in English until October 2018. The process of searching,  
178 extracting key words, and filtering and excluding studies, will be carried out  
179 independently and by duplicate by at least two researchers and in case of  
180 disagreement will be decided by agreement with a third reviewer.

181

### 182 **Identifying relevant studies**

183 We will apply the inclusion criteria, described previously, for the selection of  
184 studies. The process will be carried out by at least two researchers and in case  
185 of disagreement will be decided by agreement with a third reviewer.

186

### 187 **Charting the data.**

188 We will develop a draft charting to record the information that will be relevant to  
189 the review.

190 Questions focusing on:

191 *1) Mapping studies:* Author(s), Year of publication, origin/country of origin  
192 (where the study was published or conducted), authors filiation, type of study, a  
193 priori design, registration, conflict of interest, funding;

1  
2  
3  
4  
5 194 2) *Epidemiological and genetics aspects*: Study population and sample size,  
6  
7  
8 195 genetic studies;

9  
10 196 3) *Evaluation of the efficacy and safety of drugs for each disease*: Intervention  
11  
12 197 type, comparator and details of these, duration of the intervention, dosage,  
13  
14 198 outcomes and details of these and adverse events.

15  
16  
17 199 The data collection will be done by at least two reviewers using a piloting  
18  
19 200 customized Google AppSheet form (<https://www.appsheet.com/>) and in case of  
20  
21 201 disagreement will be decided by agreement with a third reviewer. We anticipate  
22  
23 202 that we can start retrieving data in April 2019 and finalizing by September 2019.

24  
25  
26 203

## 27 28 204 **5. Collating, summarizing and reporting results**

29  
30 205 The elements of the PCC inclusion criteria will guide the presentation of the  
31  
32 206 data. Firstly, we will present the results of the search in the PRISMA flow chart.

33  
34  
35 207 Secondly, we will organize the extracted data for topics defined as follows:

36  
37 208 indications, mechanism of action, efficacy safety and cost. For each category, a  
38  
39 209 clear explanation will be provided. The results of the scoping review will be  
40  
41 210 presented as a map, in both diagrammatic and tabular form, and in a descriptive  
42  
43 211 format. A narrative summary will accompany the tabulated and/or charted  
44  
45 212 results and will describe how the results relate to the review objective and  
46  
47 213 question(s).

48  
49  
50  
51 214

## 52 53 215 **6. Differences between the protocol and the overview**

54  
55 216 Changes in the methodology that need to be carried out throughout the study  
56  
57 217 will be detailed in the results section.

1  
2  
3  
4  
5 218  
6  
7

8 **219 Compliance with Ethics Guidelines**

9  
10 220 This protocol relates to a search for previously conducted studies, and does not  
11  
12 221 involve any new human or animal studies performed by the authors.  
13

14 222  
15

16  
17 **223 Patient and Public Involvement**

18  
19 224 Patients and or public were not involved in the development of this protocol.  
20

21 225  
22

23 226  
24

25 227  
26  
27  
28  
29  
30  
31  
32  
33  
34  
35  
36  
37  
38  
39  
40  
41  
42  
43  
44  
45  
46  
47  
48  
49  
50  
51  
52  
53  
54  
55  
56  
57  
58  
59  
60

1  
2  
3  
4  
5  
6  
7 **228 CONCLUSION**  
8  
9

10 229 Here, we have presented a protocol for systematically conducting a scoping  
11  
12 230 review to broadly analyze the available evidence on the indications for and the  
13  
14 231 mechanisms of action, efficacy, and safety of JAK/STAT pathway-targeting  
15  
16 232 drugs in the use of dermatological therapy. Evidence-based medicine is  
17  
18 233 intended to optimize decision-making by emphasizing the use of evidence  
19  
20 234 derived from well-designed and well-conducted research. Currently, most  
21  
22 235 reviews of treatments blocking the JAK/STAT pathway are narrative reviews,  
23  
24 236 which lack the necessary methodological detail to promote reproducibility and  
25  
26 237 reduce the risk of bias.<sup>15,16</sup> Secondary research methodologies are constantly  
27  
28 238 being developed and must be adapted to the type of research question being  
29  
30 239 asked and the urgency with which the question must be answered.<sup>17</sup>  
31  
32  
33  
34  
35

36 240 Although we will try to analyse the quality of evidence per variable and disease  
37  
38 241 using GRADE approach, probably most of the studies have produced  
39  
40 242 documents communicating partial results following an observational design,  
41  
42 243 which is associated with low or very low quality of evidence. However, we  
43  
44 244 believe that the scoping review methodology is the one of the best suited  
45  
46 245 protocols to answer the question posed in this study. The results will provide  
47  
48 246 unique insights into the available evidence on the use of JAK/STAT pathway-  
49  
50 247 targeting drugs in the treatment of dermatological diseases, facilitating the  
51  
52 248 detection of knowledge gaps and the identification of new questions to address  
53  
54 249 via additional systematic reviews.  
55  
56  
57  
58  
59  
60

1  
2  
3  
4  
5 **250 ACKNOWLEDGEMENTS**  
6

7 **251 Funding.** This work was supported, in part, by project ICI1400136 (which  
8  
9  
10  
11  
12  
13  
14  
15  
16  
17  
18  
19  
20  
21  
22  
23  
24  
25  
26  
27  
28  
29  
30  
31  
32  
33  
34  
35  
36  
37  
38  
39  
40  
41  
42  
43  
44  
45  
46  
47  
48  
49  
50  
51  
52  
53  
54  
55  
56  
57  
58  
59  
60  
252 provided funding for J.R.), integrated into the National Plan of R+D+I 2008-  
253 2011, co-financed by the ISCIII-Subdireccion General de Evaluacion and  
254 European Regional Development Fund (ERDF), by project PIN-0316-2017-  
255 Consejeria de Salud-Junta de Andalucia (J.R.). No funding was obtained from  
256 any pharmaceutical company. The views expressed in this manuscript are  
257 those of the authors and do not necessarily represent the views of the funders.

258 **Authorship.** All named authors meet the International Committee of Medical  
259 Journal Editors (ICMJE) criteria for authorship for this article, take responsibility  
260 for the integrity of the work as a whole, and have given their approval for this  
261 version to be published. The authors are also grateful to the reviewers for their  
262 helpful comments and suggestions. We would also like to thank Editage  
263 (www.editage.com) for performing English-language editing of this review.

264 **Competing interests.** None declared.

265 **Provenance and peer review.** Not commissioned; externally peer reviewed.

266 **Compliance with Ethics Guidelines.** This protocol relates to a search for  
267 previously conducted studies, and does not involve any new human or animal  
268 subjects performed by the authors.

269 **Data sharing statement.** All the original data are presented in the text and  
270 tables of the protocol.

271 **Contributors.** FGG and JR conceived the study. FGG, PJGA, JH, AMM, JGM, MAL,  
272 IVG, AVGN, BIT, and JR contributed to the protocol design and plan. FGG, PJGA, and

1  
2  
3  
4  
5 273 JH developed the literature search strategy. All the authors worked collaboratively to  
6  
7  
8 274 draft and revise the manuscript, and read and approved the final version. All the authors  
9  
10 275 made substantive intellectual contributions to the development of this protocol. JR is the  
11  
12 276 guarantor of the review.  
13  
14

15 277 **Open Access.** This is an Open Access article distributed in accordance with the  
16  
17 278 Creative Commons Attribution Non Commercial (CC BY-NC 4.0) license, which  
18  
19 279 permits others to distribute, remix, adapt, build upon this work non-commercially, and  
20  
21 280 license their derivative works on different terms, provided the original work is properly  
22  
23 281 cited and the use is non-commercial.  
24  
25  
26  
27

28 282  
29  
30

31 283  
32  
33

34 284  
35  
36

37 285  
38  
39  
40  
41  
42  
43  
44  
45  
46  
47  
48  
49  
50  
51  
52  
53  
54  
55  
56  
57  
58  
59  
60

286 **REFERENCES**

- 287 1. Jason S. Rawlings, Kristin M. Rosler, Douglas A. Harrison, The JAK/STAT  
288 signaling pathway. *Journal of Cell Science* 2004;117:1281-1283.
- 289 2. Samadi A, Ahmad Nasrollahi S, Hashemi A, Nassiri Kashani M, Firooz A.  
290 Janus kinase (JAK) inhibitors for the treatment of skin and hair disorders: a  
291 review of literature. *J Dermatolog Treat* 2017;28:476-483.
- 292 3. Seavey MM, Dobrzanski P. The many faces of Janus kinase. *Biochem*  
293 *Pharmacol* 2012;83:1136-1145.
- 294 4. Schwartz DM, Bonelli M, Gadina M, O'Shea JJ. Type I/II cytokines, JAKs,  
295 and new strategies for treating autoimmune diseases. *Nat Rev*  
296 *Rheumatol* 2016;12:25-36.
- 297 5. Damsky W, King BA. JAK inhibitors in dermatology: The promise of a new  
298 drug class. *J Am Acad Dermatol* 2017;76:736-744.
- 299 6. Ghoreschi K, Jesson MI, Li X, et al. Modulation of innate and adaptive  
300 immune responses by tofacitinib (CP-690,550). *J Immunol* 2011;186:4234-4243.
- 301 7. Palanivel JA, Macbeth AE, Chetty NC, Levell NJ. An insight into JAK-STAT  
302 signalling in dermatology. *Clin Exp Dermatol* 2014;39:513-8.
- 303
- 304 8. Welsch K, Holstein J, Laurence A, Ghoreschi K. Targeting JAK/STAT  
305 signalling in inflammatory skin diseases with small molecule inhibitors. *Eur J*  
306 *Immunol* 2017;47:1096-1107.
- 307
- 308 9. [https://investor.incyte.com/news-releases/news-release-details/fda-approves-](https://investor.incyte.com/news-releases/news-release-details/fda-approves-incytes-jakafitm-ruxolitinib-patients-myelofibrosis)  
309 [incytes-jakafitm-ruxolitinib-patients-myelofibrosis](https://investor.incyte.com/news-releases/news-release-details/fda-approves-incytes-jakafitm-ruxolitinib-patients-myelofibrosis)
- 310
- 311 10. Traynor K. FDA approves tofacitinib for rheumatoid arthritis. *Am J Health*  
312 *Syst Pharm* 2012;69:2120.

313



- 1  
2  
3  
4  
5 314 11. Shreberk-Hassidim R, Ramot Y, Zlotogorski A. Janus kinase inhibitors in  
6 315 dermatology: A systematic review. *J Am Acad Dermatol* 2017;76:745-753.e19.  
7  
8 316  
9  
10 317 12. Colquhoun HL, Levac D, O'Brien KK, Straus S, Tricco AC, Perrier L,  
11 318 Kastner M and Moher D. Scoping reviews: time for clarity in definition, methods,  
12 319 and reporting. *Journal of Clinical Epidemiology* 2014;67:1291-1294.  
13  
14 320  
15  
16 321 13. The Joanna Briggs Institute. The Joanna Briggs Institute reviewer's  
17 322 manual 2015. <http://joannabriggs.org/assets/docs/sumari/Reviewers->  
18 323 [Manual\\_Methodology-for-JBI-Scoping-Reviews\\_2015\\_v2.pdf](http://joannabriggs.org/assets/docs/sumari/Reviewers-). Accessed 29  
19 324 Sept 2016.  
20  
21 325  
22  
23 326 14. Tricco AC, Lillie E, Zarin W, O'Brien KK, et al. PRISMA extension for  
24 327 scoping reviews (PRISMA ScR): checklist and explanation. *Ann Intern Med*  
25 328 2018;169:467-473.  
26  
27 329  
28  
29 330 15. Yamaoka K, Saharinen P, Pesu M, Holt VE 3rd, Silvennoinen O, O'Shea JJ.  
30 331 The Janus kinases (Jaks). *Genome Biol* 2004;5:253.  
31  
32 332  
33 333 16. O'Shea JJ, Schwartz DM, Villarino AV, et al. The JAK-STAT pathway:  
34 334 impact on human disease and therapeutic intervention. *Annu Rev Med*  
35 335 2015;66:311-28.  
36  
37 336  
38  
39 337 17. Moher D, Stewart L, Shekelle P. All in the family: systematic reviews, rapid  
40 338 reviews, scoping reviews, realist reviews, and more. *Syst Rev* 2015;22:183.  
41  
42  
43  
44  
45  
46  
47  
48  
49  
50  
51  
52  
53  
54  
55  
56  
57  
58  
59  
60

1  
2  
3  
4  
5  
6  
7  
8  
9  
10  
11  
12  
13  
14  
15  
16  
17  
18  
19  
20  
21  
22  
23  
24  
25  
26  
27  
28  
29  
30  
31  
32  
33  
34  
35  
36  
37  
38  
39  
40  
41  
42  
43  
44  
45  
46

339 **TABLES**

340 **Table 1. Stages of the scoping reviews.**

|                                        |                                      |                                                                                                                                                                                                               |
|----------------------------------------|--------------------------------------|---------------------------------------------------------------------------------------------------------------------------------------------------------------------------------------------------------------|
| <b>1. Research Question Identified</b> | 1.1. Overarching goal                | To explore the depth and breadth of evidence for the indications, epidemiology, genetics, efficacy and safety of drugs that act on JAK/STAT pathway in the treatment of patients with dermatological diseases |
|                                        | 1.2. Research question               | What are the indications, epidemiology, genetics, efficacy and safety of drugs that act on JAK/STAT pathway in the treatment of dermatological diseases?                                                      |
|                                        | 1.3. Purposes of this scoping review | 1.3.1. Review the evidence of indications for drugs that act on JAK/STAT pathway in the treatment of dermatological diseases                                                                                  |
|                                        |                                      | 1.3.2. Review the evidence of epidemiology of drugs acting on JAK/STAT pathway in the treatment of dermatological diseases                                                                                    |
|                                        |                                      | 1.3.3. Review the evidence of genetics of drugs acting on JAK/STAT pathway in the treatment of dermatological diseases                                                                                        |
|                                        |                                      | 1.3.4. Review the evidence on efficacy of the drugs that act on JAK/STAT pathway in the treatment of dermatological diseases                                                                                  |
|                                        |                                      | 1.3.5. Review the evidence on safety of drugs that act on JAK/STAT pathway in the treatment of dermatological diseases                                                                                        |

|                                           |                                                                                                                                                     |                                                                                                                                                                                                         |
|-------------------------------------------|-----------------------------------------------------------------------------------------------------------------------------------------------------|---------------------------------------------------------------------------------------------------------------------------------------------------------------------------------------------------------|
|                                           |                                                                                                                                                     | 1.3.6. Obtain concrete research questions that can be answered through a systematic review                                                                                                              |
|                                           |                                                                                                                                                     | 1.3.7. Identify research gaps in the existing literature                                                                                                                                                |
| <b>2. Identifying relevant literature</b> | 2.1. We will perform a three steps-search                                                                                                           | 2.1.1. First search: an initial limited search of the MEDLINE and EMBASE databases to find keywords in the title, abstract, and the index terms used to describe the articles                           |
|                                           |                                                                                                                                                     | 2.1.2. Second search: a search of MEDLINE and EMBASE using all identified keywords. <i>Additionally, CINAHL, Scopus, and Web of Science to the search engines will be searched in this second step.</i> |
|                                           |                                                                                                                                                     | 2.1.3. Third search: the reference lists of all identified reports and articles will be searched for additional studies                                                                                 |
|                                           | 2.2. We will include the studies published in full text in English until October 2018                                                               |                                                                                                                                                                                                         |
|                                           | 2.3. We will contact authors, of primary studies or reviews, for further information, if this is relevant                                           |                                                                                                                                                                                                         |
|                                           | 2.4. The search and selection will be done by at least two reviewers and in case of disagreement will be decided by agreement with a third reviewer |                                                                                                                                                                                                         |
| <b>3. Selecting studies</b>               | 3.1. Inclusion criteria                                                                                                                             | 3.1.1. We will include in the review the studies on the human use of drugs inhibitors of JAK/STAT pathway published on the topics: indications, epidemiology, genetics, efficacy, and safety.           |

1  
2  
3  
4  
5  
6  
7  
8  
9  
10  
11  
12  
13  
14  
15  
16  
17  
18  
19  
20  
21  
22  
23  
24  
25  
26  
27  
28  
29  
30  
31  
32  
33  
34  
35  
36  
37  
38  
39  
40  
41  
42  
43  
44  
45  
46

|                                                        |                                                                                                                                                                            |                                                                                                                                                                         |
|--------------------------------------------------------|----------------------------------------------------------------------------------------------------------------------------------------------------------------------------|-------------------------------------------------------------------------------------------------------------------------------------------------------------------------|
|                                                        |                                                                                                                                                                            | 3.1.2. Design of the studies: we will include guidelines, systematic reviews, randomized clinical trials, observational studies, cross sectional case report and series |
|                                                        | 3.2. Exclusion criteria                                                                                                                                                    | 3.2.1. We will exclude narrative reviews and studies performed <i>in vitro</i> or using animal models                                                                   |
| <b>4. Charting the data</b>                            | 4.1. We will extract the data in a predefined form.                                                                                                                        |                                                                                                                                                                         |
|                                                        | 4.2. From each study we will extract title, objective, main variables related to patients, intervention, comparator, outcomes (efficacy and safety) and bibliographic data |                                                                                                                                                                         |
|                                                        | 4.3. We will classify the studies by treatment indication                                                                                                                  |                                                                                                                                                                         |
|                                                        | 4.4. The list of studies, variables and data of there view will be published in an online-file                                                                             |                                                                                                                                                                         |
|                                                        | 4.5. The data collection will be done by at least two reviewers and in case of disagreement will be decided by agreement with a third reviewer                             |                                                                                                                                                                         |
| <b>5. Collating, summarizing and reporting results</b> | 5.1. The results of comprehensive search will be presented using the PRISMA flow diagram                                                                                   |                                                                                                                                                                         |
|                                                        | 5.2. We will synthesize qualitatively the evidence obtained ordering it by topics: indications, mechanism of action, efficacy and safety of drugs that act on              |                                                                                                                                                                         |

|                                                             |                                                                                                                                          |  |
|-------------------------------------------------------------|------------------------------------------------------------------------------------------------------------------------------------------|--|
|                                                             | JAK/STAT pathway to treat dermatological diseases and we will present it in a diagrammatic tabular form and in a descriptive format      |  |
|                                                             | 5.3. We will use the extension of PRISMA for scoping review for the notification of the review                                           |  |
| <b>6. Differences between the protocol and the overview</b> | Any changes in the methodology that need to be carried out through out the study will be detailed together with the results publication. |  |

17 341

20 342

22 343

1  
2 344  
3 345  
4 346  
5 347  
6 348  
7 348

**Table 2. Draft of first step of search strategy to be used for at least two electronic databases.**

**MEDLINE (Ovid), Embase (Ovid)**

|        |                                                                                                                                                                                                                                                                                                                                                                                                                                                                                                                                                                                                                                                                                                                                                                                                                                                                                                                                                                                                                   |
|--------|-------------------------------------------------------------------------------------------------------------------------------------------------------------------------------------------------------------------------------------------------------------------------------------------------------------------------------------------------------------------------------------------------------------------------------------------------------------------------------------------------------------------------------------------------------------------------------------------------------------------------------------------------------------------------------------------------------------------------------------------------------------------------------------------------------------------------------------------------------------------------------------------------------------------------------------------------------------------------------------------------------------------|
| search |                                                                                                                                                                                                                                                                                                                                                                                                                                                                                                                                                                                                                                                                                                                                                                                                                                                                                                                                                                                                                   |
| #1     | (('tofacitinib' OR 'baricitinib' OR 'ruxolitinib' OR 'oclacitinib' OR 'upadacitinib' OR 'delgocitinib' OR 'itacitinib' OR 'mometinib' OR peficitinib OR 'decernotinib' OR 'fedratinib' OR 'pacritinib' OR 'filgotinib' OR 'gandotinib' OR 'solcitinib' OR 'lestaurtinib' OR 'janus kinase inhibitor')                                                                                                                                                                                                                                                                                                                                                                                                                                                                                                                                                                                                                                                                                                             |
| #2     | (('psoriasis'/exp OR psoriasis) OR 'atopic dermatitis' OR 'alopecia' OR 'contact dermatitis' OR 'vitiligo' OR 'graft versus host reaction' OR 'lichen planus' OR 'pyoderma gangrenosum' OR 'pruritus' OR (eosinofilic AND annulare AND erythema) OR 'male type alopecia' OR 'proteasome associated autoinflammatory syndrome' OR 'sting associated vasculopathy with onset in infancy' OR 'chronic atypical neutrophilic dermatosis with lipodystrophy and elevated temperature syndrome' OR 'hand dermatitis' OR 'discoid lupus erythematosus' OR 'mucocutaneous candidiasis' OR (urticaria AND chronic) OR 'suppurative hidradenitis' OR 'melanoma' OR 'non melanoma skin cancer' OR 'acne' OR 'lichen sclerosus et atrophicus' OR 'pityriasis rubra pilaris' OR 'pemphigus' OR 'skin disease' OR 'rosaceae' OR 'scleroderma' OR 'cinca syndrome' OR 'hyperhidrosis' OR 'erythropoietic protoporphyria' OR 'anca associated vasculitis' OR 'seborrheic dermatitis' OR 'herpes simplex' OR 'sjoegren syndrome')) |
| #3     | #1 AND #2                                                                                                                                                                                                                                                                                                                                                                                                                                                                                                                                                                                                                                                                                                                                                                                                                                                                                                                                                                                                         |

22 349  
23  
24 350  
25  
26  
27 351  
28  
29 352  
30 353  
31  
32  
33  
34  
35  
36  
37  
38  
39  
40  
41  
42  
43  
44  
45  
46

**PRISMA-P (Preferred Reporting Items for Systematic review and Meta-Analysis Protocols) 2015 checklist: recommended items to address in a systematic review protocol\***

| Section and topic                 | Item No | Checklist item                                                                                                                                                                                                                | (Page No.#) |
|-----------------------------------|---------|-------------------------------------------------------------------------------------------------------------------------------------------------------------------------------------------------------------------------------|-------------|
| <b>ADMINISTRATIVE INFORMATION</b> |         |                                                                                                                                                                                                                               |             |
| Title:                            |         | <b>Drugs targeting the JAK/STAT pathway for the treatment of immune-mediated inflammatory skin diseases: protocol for a scoping review</b>                                                                                    |             |
| Identification                    | 1a      | Identify the report as a protocol of a systematic review                                                                                                                                                                      | 1           |
| Update                            | 1b      | If the protocol is for an update of a previous systematic review, identify as such                                                                                                                                            | NA          |
| Registration                      | 2       | If registered, provide the name of the registry (such as PROSPERO) and registration number                                                                                                                                    | NA          |
| Authors:                          |         |                                                                                                                                                                                                                               |             |
| Contact                           | 3a      | Provide name, institutional affiliation, e-mail address of all protocol authors; provide physical mailing address of corresponding author                                                                                     | 1-2         |
| Contributions                     | 3b      | Describe contributions of protocol authors and identify the guarantor of the review                                                                                                                                           | 10          |
| Amendments                        | 4       | If the protocol represents an amendment of a previously completed or published protocol, identify as such and list changes; otherwise, state plan for documenting important protocol amendments                               | 13,14       |
| Support:                          |         |                                                                                                                                                                                                                               |             |
| Sources                           | 5a      | Indicate sources of financial or other support for the review                                                                                                                                                                 | 13          |
| Sponsor                           | 5b      | Provide name for the review funder and/or sponsor                                                                                                                                                                             | 13          |
| Role of sponsor or funder         | 5c      | Describe roles of funder(s), sponsor(s), and/or institution(s), if any, in developing the protocol                                                                                                                            | 13          |
| <b>INTRODUCTION</b>               |         |                                                                                                                                                                                                                               |             |
| Rationale                         | 6       | Describe the rationale for the review in the context of what is already known                                                                                                                                                 | 5-7         |
| Objectives                        | 7       | Provide an explicit statement of the question(s) the review will address with reference to participants, interventions, comparators, and outcomes (PICO)                                                                      | 8           |
| <b>METHODS</b>                    |         |                                                                                                                                                                                                                               |             |
| Eligibility criteria              | 8       | Specify the study characteristics (such as PICO, study design, setting, time frame) and report characteristics (such as years considered, language, publication status) to be used as criteria for eligibility for the review | 4-5         |
| Information sources               | 9       | Describe all intended information sources (such as electronic databases, contact with study authors, trial registers or other grey literature sources) with planned dates of coverage                                         | 9-11        |
| Search strategy                   | 10      | Present draft of search strategy to be used for at least one electronic database, including planned limits, such that it could be                                                                                             | Table 2     |

|                                    |     |                                                                                                                                                                                                                                                     |             |
|------------------------------------|-----|-----------------------------------------------------------------------------------------------------------------------------------------------------------------------------------------------------------------------------------------------------|-------------|
|                                    |     | repeated                                                                                                                                                                                                                                            |             |
| Study records:                     |     |                                                                                                                                                                                                                                                     |             |
| Data management                    | 11a | Describe the mechanism(s) that will be used to manage records and data throughout the review                                                                                                                                                        | 10-11       |
| Selection process                  | 11b | State the process that will be used for selecting studies (such as two independent reviewers) through each phase of the review (that is, screening, eligibility and inclusion in meta-analysis)                                                     | 10          |
| Data collection process            | 11c | Describe planned method of extracting data from reports (such as piloting forms, done independently, in duplicate), any processes for obtaining and confirming data from investigators                                                              | 10          |
| Data items                         | 12  | List and define all variables for which data will be sought (such as PICO items, funding sources), any pre-planned data assumptions and simplifications                                                                                             | 10-11       |
| Outcomes and prioritization        | 13  | List and define all outcomes for which data will be sought, including prioritization of main and additional outcomes, with rationale                                                                                                                | 11          |
| Risk of bias in individual studies | 14  | Describe anticipated methods for assessing risk of bias of individual studies, including whether this will be done at the outcome or study level, or both; state how this information will be used in data synthesis                                | NA          |
| Data synthesis                     | 15a | Describe criteria under which study data will be quantitatively synthesised                                                                                                                                                                         | NA/11/NA/11 |
|                                    | 15b | If data are appropriate for quantitative synthesis, describe planned summary measures, methods of handling data and methods of combining data from studies, including any planned exploration of consistency (such as I <sup>2</sup> , Kendall's τ) |             |
|                                    | 15c | Describe any proposed additional analyses (such as sensitivity or subgroup analyses, meta-regression)                                                                                                                                               |             |
|                                    | 15d | If quantitative synthesis is not appropriate, describe the type of summary planned                                                                                                                                                                  |             |
| Meta-bias(es)                      | 16  | Specify any planned assessment of meta-bias(es) (such as publication bias across studies, selective reporting within studies)                                                                                                                       | 11          |
| Confidence in cumulative evidence  | 17  | Describe how the strength of the body of evidence will be assessed (such as GRADE)                                                                                                                                                                  | 11          |

**\*It is strongly recommended that this checklist be read in conjunction with the PRISMA-P Explanation and Elaboration (cite when available) for important clarification on the items. Amendments to a review protocol should be tracked and dated. The copyright for PRISMA-P (including checklist) is held by the PRISMA-P Group and is distributed under a Creative Commons Attribution Licence 4.0.**

*From: Shamseer L, Moher D, Clarke M, Ghersi D, Liberati A, Petticrew M, Shekelle P, Stewart L, PRISMA-P Group. Preferred reporting items for systematic review and meta-analysis protocols (PRISMA-P) 2015: elaboration and explanation. BMJ. 2015 Jan 2;349(jan02 1):g7647.*



# BMJ Open

## Drugs targeting the JAK/STAT pathway for the treatment of immune-mediated inflammatory skin diseases: protocol for a scoping review

|                                 |                                                                                                                                                                                                                                                                                                                                                                                                                                                                                                                                                                                                                                                                                                                                                                                                                                                                                                                                                                                                                                                                                                                                                                                                                                                                                                                                                                                                                                                                                                                                                                                                                                                                                                                                                                                                                               |
|---------------------------------|-------------------------------------------------------------------------------------------------------------------------------------------------------------------------------------------------------------------------------------------------------------------------------------------------------------------------------------------------------------------------------------------------------------------------------------------------------------------------------------------------------------------------------------------------------------------------------------------------------------------------------------------------------------------------------------------------------------------------------------------------------------------------------------------------------------------------------------------------------------------------------------------------------------------------------------------------------------------------------------------------------------------------------------------------------------------------------------------------------------------------------------------------------------------------------------------------------------------------------------------------------------------------------------------------------------------------------------------------------------------------------------------------------------------------------------------------------------------------------------------------------------------------------------------------------------------------------------------------------------------------------------------------------------------------------------------------------------------------------------------------------------------------------------------------------------------------------|
| Journal:                        | <i>BMJ Open</i>                                                                                                                                                                                                                                                                                                                                                                                                                                                                                                                                                                                                                                                                                                                                                                                                                                                                                                                                                                                                                                                                                                                                                                                                                                                                                                                                                                                                                                                                                                                                                                                                                                                                                                                                                                                                               |
| Manuscript ID                   | bmjopen-2018-028303.R2                                                                                                                                                                                                                                                                                                                                                                                                                                                                                                                                                                                                                                                                                                                                                                                                                                                                                                                                                                                                                                                                                                                                                                                                                                                                                                                                                                                                                                                                                                                                                                                                                                                                                                                                                                                                        |
| Article Type:                   | Protocol                                                                                                                                                                                                                                                                                                                                                                                                                                                                                                                                                                                                                                                                                                                                                                                                                                                                                                                                                                                                                                                                                                                                                                                                                                                                                                                                                                                                                                                                                                                                                                                                                                                                                                                                                                                                                      |
| Date Submitted by the Author:   | 12-Apr-2019                                                                                                                                                                                                                                                                                                                                                                                                                                                                                                                                                                                                                                                                                                                                                                                                                                                                                                                                                                                                                                                                                                                                                                                                                                                                                                                                                                                                                                                                                                                                                                                                                                                                                                                                                                                                                   |
| Complete List of Authors:       | <p>Gomez-Garcia, Francisco; Hospital Universitario Reina Sofia, Dermatology; Instituto Maimonides de Investigacion Biomedica de Cordoba (IMIBIC)/Hospital Universitario Reina Sofia/Universidad de Cordoba</p> <p>Gomez-Arias, Pedro Jesus; Hospital Universitario Reina Sofia, Dermatology; Instituto Maimonides de Investigacion Biomedica de Cordoba (IMIBIC)/Hospital Universitario Reina Sofia/Universidad de Cordoba</p> <p>Hernandez, Jorge; Hospital Universitario Reina Sofia, Pharmacy</p> <p>Montilla, Ana Maria; Instituto Maimonides de Investigacion Biomedica de Cordoba (IMIBIC)/Hospital Universitario Reina Sofia/Universidad de Cordoba; University of Cordoba, School of Medicine</p> <p>Gay-Mimbrera, Jesús; Instituto Maimonides de Investigacion Biomedica de Cordoba (IMIBIC)/Hospital Universitario Reina Sofia/Universidad de Cordoba</p> <p>Aguilar-Luque, Macarena; Instituto Maimonides de Investigacion Biomedica de Cordoba (IMIBIC)/Hospital Universitario Reina Sofia/Universidad de Cordoba</p> <p>Viguera-Guerra, Isabel; Instituto Maimonides de Investigacion Biomedica de Cordoba (IMIBIC)/Hospital Universitario Reina Sofia/Universidad de Cordoba</p> <p>Velez Garcia-Nieto, Antonio; Hospital Universitario Reina Sofia, Dermatology; Instituto Maimonides de Investigacion Biomedica de Cordoba (IMIBIC)/Hospital Universitario Reina Sofia/Universidad de Cordoba</p> <p>Isla-Tejera, Beatriz; Hospital Universitario Reina Sofia, Pharmacy; Instituto Maimonides de Investigacion Biomedica de Cordoba (IMIBIC)/Hospital Universitario Reina Sofia/Universidad de Cordoba</p> <p>Ruano, Juan; Hospital Universitario Reina Sofia, Dermatology; Instituto Maimonides de Investigacion Biomedica de Cordoba (IMIBIC)/Hospital Universitario Reina Sofia/Universidad de Cordoba</p> |
| <b>Primary Subject Heading</b>: | Dermatology                                                                                                                                                                                                                                                                                                                                                                                                                                                                                                                                                                                                                                                                                                                                                                                                                                                                                                                                                                                                                                                                                                                                                                                                                                                                                                                                                                                                                                                                                                                                                                                                                                                                                                                                                                                                                   |
| Secondary Subject Heading:      | Immunology (including allergy), Pharmacology and therapeutics                                                                                                                                                                                                                                                                                                                                                                                                                                                                                                                                                                                                                                                                                                                                                                                                                                                                                                                                                                                                                                                                                                                                                                                                                                                                                                                                                                                                                                                                                                                                                                                                                                                                                                                                                                 |
| Keywords:                       | Protocol, scoping review, JAK/STAT pathway, immune-mediated inflammatory skin diseases, PRISMA                                                                                                                                                                                                                                                                                                                                                                                                                                                                                                                                                                                                                                                                                                                                                                                                                                                                                                                                                                                                                                                                                                                                                                                                                                                                                                                                                                                                                                                                                                                                                                                                                                                                                                                                |

1  
2  
3  
4  
5  
6  
7  
8  
9  
10  
11  
12  
13  
14  
15  
16  
17  
18  
19  
20  
21  
22  
23  
24  
25  
26  
27  
28  
29  
30  
31  
32  
33  
34  
35  
36  
37  
38  
39  
40  
41  
42  
43  
44  
45  
46  
47  
48  
49  
50  
51  
52  
53  
54  
55  
56  
57  
58  
59  
60



SCHOLARONE™  
Manuscripts

1 Protocol

2 **BMJ Open**

3 **Title:** Drugs targeting the JAK/STAT pathway for the treatment of immune-  
4 mediated inflammatory skin diseases: protocol for a scoping review

5 **Short title:** Scoping review of JAK/STAT blockade in dermatology

6 **Authors:**

7 Francisco Gomez-Garcia, MD, PhD<sup>1,2,#</sup>, fjpgg79@gmail.com

8 Pedro Jesus Gomez-Arias, MD<sup>1,2</sup>, pedrojesusgomezarias@gmail.com

9 Jorge Hernandez, PharmD<sup>4</sup>, jorge.hernandez.sspa@juntadeandalucia.es

10 Ana Maria Montilla, MS<sup>2,3</sup>, h32moloa@uco.es

11 Jesús Gay-Mimbrera, BSc<sup>2</sup>, gaymimbrera@gmail.com

12 Macarena Aguilar-Luque, BSc<sup>2</sup>, b82aglum@uco.es

13 Isabel Viguera-Guerra, PharmD<sup>2</sup>, isabelvigue@gmail.com

14 Antonio Velez Garcia-Nieto, MD, PhD<sup>1,2</sup>; avelez108@gmail.com

15 Beatriz Isla-Tejera, PharmD, PhD<sup>2,4</sup>, beatrizislatj@gmail.com

16 Juan Ruano, MD, PhD<sup>1,2,#,\*</sup>, juanruanoruiz@mac.com

17 **Author affiliations:**

18 <sup>1</sup> Department of Dermatology, Hospital Universitario Reina Sofia, Cordoba,  
19 Spain

- 1  
2  
3  
4  
5  
6 20 <sup>2</sup> Instituto Maimonides de Investigacion Biomedica de Cordoba  
7  
8 21 (IMIBIC)/Hospital Universitario Reina Sofía/Universidad de Cordoba, Cordoba,  
9  
10 22 Spain  
11  
12  
13 23 <sup>3</sup> School of Medicine, University of Cordoba, Cordoba, Spain  
14  
15 24 <sup>4</sup> Department of Pharmacy, Hospital Universitario Reina Sofia, Cordoba, Spain  
16  
17  
18  
19 25 #Contributed equally to this work.  
20  
21  
22 26 **\*Corresponding author:** Juan Ruano, Instituto Maimonides de Investigacion  
23  
24 27 Biomedica de Cordoba, 14004, Cordoba, Spain. Phone: +34 606 88 7057  
25  
26 28 E-mail: [juanruanoruiz@mac.com](mailto:juanruanoruiz@mac.com)  
27  
28  
29 29 **World count:** 1,450; **Tables:** 2; **Figures:** 0.  
30  
31  
32  
33  
34  
35  
36  
37  
38  
39  
40  
41  
42  
43  
44  
45  
46  
47  
48  
49  
50  
51  
52  
53  
54  
55  
56  
57  
58  
59  
60

1  
2  
3  
4  
5 **30 ABSTRACT**

6 **31 Introduction.** The JAK/STAT pathway is known to be involved in inflammatory  
7  
8  
9  
10  
11  
12  
13  
14  
15  
16  
17  
18  
19  
20  
21  
22  
23  
24  
25  
26  
27  
28  
29  
30  
31  
32  
33  
34  
35  
36  
37  
38  
39  
40  
41  
42  
43  
44  
45  
46  
47  
48  
49  
50  
51  
52  
53  
54  
55  
56  
57  
58  
59  
60  
and neoplastic skin diseases, like psoriasis, atopic dermatitis, alopecia areata,  
vitiligo, and melanoma. Improved knowledge of the components of this pathway  
has allowed the development of drugs, which act by inhibiting the pathway,  
blocking specific components. This offers new therapeutic opportunities.  
Although evidence on the use of JAK/STAT blockades in dermatological  
diseases is growing, none have been approved for use in treating skin diseases.  
The aim of this study is to develop an *a priori* protocol to broadly review the  
available evidence on the use of drugs targeting the JAK/STAT pathway in the  
treatment of dermatological diseases.

41 **Methods and analysis.** For the conduction of the scoping review protocol, we  
42 will employ an established scoping review methodology described in the Joanna  
43 Briggs Institute manual. This methodology outlines a 5-stage approach: 1) identify  
44 the research question; 2) identify relevant studies; 3) select studies; 4) chart the data;  
45 and 5) collate, summarize, and report the results, with an optional consultation exercise.  
46 Finally, we will use the Preferred Reporting Items for Systematic Reviews and Meta-  
47 Analyses (PRISMA) Extension for Scoping Reviews (PRISMA-ScR) to present the  
48 results.

49 **Ethics and dissemination.** Since this is a review of the literature, ethics approval is  
50 not indicated. We will disseminate the findings from this study in publications in peer-  
51 reviewed journals as well as presentations at relevant national and international  
52 conferences.

53 **Keywords:** Protocol; scoping review; JAK/STAT pathway; immune-mediated  
54 inflammatory skin diseases; PRISMA.

1  
2  
3  
4  
5  
6  
7  
8  
9  
10  
11  
12  
13  
14  
15  
16  
17  
18  
19  
20  
21  
22  
23  
24  
25  
26  
27  
28  
29  
30  
31  
32  
33  
34  
35  
36  
37  
38  
39  
40  
41  
42  
43  
44  
45  
46  
47  
48  
49  
50  
51  
52  
53  
54  
55  
56  
57  
58  
59  
60  
61  
62  
63  
64  
65  
66

## 55 **Article summary**

### 56 **Strengths and limitations of this study**

- 57 ▪ Strengths of this study include the importance of unrevealing uncertainty about  
58 evidence of using drugs targeting JAK/STAT pathway when prescribed as  
59 *off-label* for dermatological diseases in the clinical setting.
  
- 60 ▪ We will use an established scoping review methodology, a systematic search  
61 developed by two health sciences librarians, and systematic screening and  
62 data abstraction carried out in duplicate.
  
- 63 ▪ A limitation of this review is the potential to miss relevant articles, especially in  
64 the grey literature. To mitigate this, we will screen meeting abstracts to  
65 identify any missed articles describing case reports not published in journals  
66 and scan reference lists of included articles and similar reviews.

## 67 INTRODUCTION

68 Improving knowledge of the molecular biology of the cell, and its adaptation to  
69 the disease pathogenesis, have allowed the design of new drugs directed  
70 against key targets in signaling pathway regulation. In this sense, the Janus  
71 kinases (JAKs) and Signal Transducer and Activator of Transcription (STATs)  
72 proteins (JAK/STAT) pathway is one of a handful of pleiotropic routes used to  
73 transduce multiple extracellular signals involved in cell proliferation,  
74 differentiation, migration, and apoptosis.<sup>1</sup> Alterations in the regulation of this  
75 process have been associated with pathological events fundamentally related to  
76 immunomodulatory and neoplastic (mainly hematological) disorders. In addition,  
77 they have been related to the pathophysiology of several dermatological  
78 diseases. Therefore, drugs that act on the JAK/STAT pathway represent an  
79 opportunity for the treatment of these disorders.<sup>2</sup>

80 The JAK family is comprised by four types of cytoplasmic tyrosine kinases:  
81 JAK1, JAK2, JAK3, and Tyk2.<sup>3</sup> STAT, of which there are seven different  
82 subtypes (STAT1, STAT2, STAT3, STAT4, STAT5a, STAT 5b, and STAT6), is  
83 the other fundamental component of the cascade<sup>4</sup>. After being phosphorylated  
84 by JAK, STAT translocates to the nucleus to induce the transcription of specific  
85 genes. Different types of ligands, from cytokines, such as interleukins (IL), to  
86 hormones, such as erythropoietin, activate this pathway to produce changes in  
87 the cell, and eventually in tissue physiology. Some of these molecules have  
88 been shown to be important, directly or indirectly, in the development of  
89 dermatological diseases. Examples of these are IL-2 and its family, IL-23,  
90 interferon alpha,<sup>5</sup> and IL-17.<sup>6</sup> The overall pathway has shown its implication in

91 the pathophysiology of diseases such as psoriasis, atopic dermatitis, lupus  
92 erythematous, melanoma, or pyoderma gangrenosum.<sup>7</sup>

93 This knowledge has led to the development of drugs that act on the JAK  
94 component of the pathway, by selectively inhibiting one (filgotinib, JAK1;  
95 pacritinib, JAK2; decernotinib, JAK3) or more than one (tofacitinib, JAK1 and  
96 JAK3; ruxolitinib, baricitinib, JAK1 and JAK2) JAK protein.<sup>8</sup> Ruxolitinib and  
97 tofacitinib were the first drugs of this class to be approved by the FDA – in 2011  
98 for myelofibrosis and in 2012 for rheumatoid arthritis, respectively.<sup>9,10</sup>

99 So far, no JAK/STAT inhibitors have been approved a license for the treatment  
100 of dermatological diseases. However, evidence exists resulting from the off-  
101 label use of these drugs, specifically tofacitinib and ruxolitinib, in different skin  
102 diseases. Knowing the efficacy and safety profile of each drug used in different  
103 dermatological diseases is essential to establish their risk-benefit balance.

104

105 Improving knowledge requires ordering evidence, establishing gaps in the  
106 evidence, and formulating questions that can be answered using systematic  
107 synthesis and analysis techniques. The aim of this is to develop guidelines that  
108 give support to physicians in making effective decisions in clinical practice. For  
109 this purpose, secondary scientific studies can develop methodologies that adapt  
110 to the specific needs of the formulated problem. The application of JAK  
111 inhibitors for the treatment of dermatological disorders is still in its early stages,  
112 and we consider it necessary to broadly review the knowledge available to date.  
113 Otherwise, the conduction of studies aimed at answering specific questions can  
114 lead to synthesis efforts that cannot be quantified.<sup>11</sup>



1  
2  
3  
4  
5 115  
6  
7

8 116 A scope review is a form of scientific synthesis that addresses an exploratory  
9  
10 117 research question, with the aim of mapping key concepts and gaps in research  
11  
12 118 related to a defined area or field.<sup>12</sup> The aim of this protocol is to define the  
13  
14 119 methodology that will be used to broadly synthesize the available evidence on  
15  
16  
17 120 the use of inhibitors of the JAK/STAT pathway in dermatological diseases.  
18

19 121

20  
21 122

22  
23 123  
24  
25  
26  
27  
28  
29  
30  
31  
32  
33  
34  
35  
36  
37  
38  
39  
40  
41  
42  
43  
44  
45  
46  
47  
48  
49  
50  
51  
52  
53  
54  
55  
56  
57  
58  
59  
60

## 124 **METHODS**

### 125 **Protocol design**

126 The aim of the study is to broadly address the published evidence on drugs  
127 targeting JAK proteins in the treatment dermatological diseases, for three  
128 purposes: a) to structure the existing knowledge in this field; b) to establish  
129 areas where there may be gaps in the evidence; c) to formulate new questions  
130 that can be answered following the methodology of systematic reviews. With  
131 this intention, we will use the methodology recently described to conduct  
132 scoping reviews.<sup>13</sup> This methodology outlines a 5-stage approach (**Table 1**): 1)  
133 identify the research question; 2) identify relevant studies; 3) select studies; 4)  
134 chart the data; and 5) collate, summarize, and report the results, with an  
135 optional consultation exercise. Finally, we will use the Preferred Reporting Items  
136 for Systematic Reviews and Meta-Analyses (PRISMA) Extension for Scoping  
137 Reviews (PRISMA-ScR) to present the results.<sup>14</sup> This protocol is reported  
138 following the recommendations of the PRISMA for protocols (PRISMA-P)  
139 statement. A checklist for this review protocol has been provided in a  
140 Supplementary file.

141

### 142 **Inclusion criteria**

143 We will use PCC (participants, concept, context) mnemotechnic rule to define  
144 the inclusion criteria as follows:

145

### 146 **Participants**

1  
2  
3  
4  
5 147 All studies that include evidence on the use of JAK protein inhibitors in humans  
6  
7  
8 148 will be included. No restrictions regarding age, ethnicity, study design, or any  
9  
10 149 other characteristics will be made.  
11

12 150

13  
14  
15 151 **Concept**

16  
17 152 We will review the existing literature on drugs targeting JAK proteins in the  
18  
19 153 treatment of dermatological diseases: indications, epidemiology, genetics,  
20  
21 154 efficacy, and safety.  
22

23 155

24  
25  
26 156 **Context**

27  
28 157 We will not limit the context to a particular setting or country.  
29

30 158

31  
32  
33 159 **Research question**

34  
35 160 What are the indications, epidemiology, genetics, efficacy, and safety of drugs  
36  
37 161 targeting proteins of STAT/JAK pathway for the treatment of dermatological  
38  
39 162 diseases?  
40

41 163

42  
43  
44 164 **Identifying relevant literature**

45  
46 165 A systematic search developed by two health sciences librarians will perform  
47  
48 166 using a three-step literature search. The first step will include an initial limited  
49  
50 167 search of the MEDLINE and EMBASE databases (**Table 2**). Then, we will carry  
51  
52 168 out analyses of: the text contained in the titles, abstracts of retrieved papers,  
53  
54 169 and the index terms used to describe the articles. In second step, we will search  
55  
56 170 the same databases using the identified key words and index terms.  
57  
58  
59  
60

1  
2  
3  
4  
5 171 Additionally, CINAHL, Scopus, and Web of Science to the search engines will  
6  
7 172 be searched in this second step. Thirdly, the reference list of all identified  
8  
9 173 reports and articles will be searched for additional studies. We will contact  
10  
11 174 authors of primary studies or reviews for further information, if relevant. We  
12  
13 175 have established a time frame of four weeks after send authors a mail  
14  
15 176 requesting information about their study or publication. We will include all  
16  
17 177 studies published in English until October 2018. The process of searching,  
18  
19 178 extracting key words, and filtering and excluding studies, will be carried out  
20  
21 179 independently and by duplicate by at least two researchers and in case of  
22  
23 180 disagreement will be decided by agreement with a third reviewer.  
24  
25  
26  
27  
28  
29

181

### 182 **Identifying relevant studies**

183 We will apply the inclusion criteria, described previously, for the selection of  
184 studies. The process will be carried out by at least two researchers and in case  
185 of disagreement will be decided by agreement with a third reviewer.

186

### 187 **Charting the data.**

188 We will develop a draft charting to record the information that will be relevant to  
189 the review.

190 Questions focusing on:

191 *1) Mapping studies:* Author(s), Year of publication, origin/country of origin  
192 (where the study was published or conducted), authors filiation, type of study, a  
193 priori design, registration, conflict of interest, funding;

1  
2  
3  
4  
5 194 2) *Epidemiological and genetics aspects*: Study population and sample size,  
6  
7  
8 195 genetic studies;

9  
10 196 3) *Evaluation of the efficacy and safety of drugs for each disease*: Intervention  
11  
12 197 type, comparator and details of these, duration of the intervention, dosage,  
13  
14 198 outcomes and details of these and adverse events.

15  
16  
17 199 The data collection will be done by at least two reviewers using a piloting  
18  
19 200 customized Google AppSheet form (<https://www.appsheet.com/>) and in case of  
20  
21 201 disagreement will be decided by agreement with a third reviewer. We anticipate  
22  
23 202 that we can start retrieving data in April 2019 and finalizing by September 2019.

24  
25  
26 203

## 27 28 204 **5. Collating, summarizing and reporting results**

29  
30 205 The elements of the PCC inclusion criteria will guide the presentation of the  
31  
32 206 data. Firstly, we will present the results of the search in the PRISMA flow chart.

33  
34 207 Secondly, we will organize the extracted data for topics defined as follows:  
35  
36 208 indications, mechanism of action, efficacy safety and cost. For each category, a  
37  
38 209 clear explanation will be provided. The results of the scoping review will be  
39  
40 210 presented as a map, in both diagrammatic and tabular form, and in a descriptive  
41  
42 211 format. A narrative summary will accompany the tabulated and/or charted  
43  
44 212 results and will describe how the results relate to the review objective and  
45  
46 213 question(s).

47  
48  
49 214

## 50 51 215 **6. Differences between the protocol and the overview**

52  
53  
54 216 Changes in the methodology that need to be carried out throughout the study  
55  
56 217 will be detailed in the results section.

1  
2  
3  
4  
5 218  
6

7  
8 **219 Ethics and dissemination**  
9

10 220 This study will analyse only anonymised public data of previously conducted  
11  
12 221 studies, and will not involve any new human or animal studies performed by the  
13  
14 222 authors. We will prepare the publication in accordance with Preferred Reporting  
15  
16 223 Items for Systematic Reviews and Meta-Analyses guideline and its adaptation  
17  
18  
19 224 for scoping reviews. We will publish our findings in peer-reviewed journals and  
20  
21 225 also may present them at conferences.  
22

23  
24 226

25 **227 Patient and Public Involvement**  
26

27  
28 228 Patients and or public were not involved in the development of this protocol.  
29

30 229 The study group developed this study protocol without patient involvement.  
31

32 230  
33

34  
35 231  
36 232  
37  
38  
39  
40  
41  
42  
43  
44  
45  
46  
47  
48  
49  
50  
51  
52  
53  
54  
55  
56  
57  
58  
59  
60

1  
2  
3  
4  
5  
6  
7 **233 CONCLUSION**  
8  
9

10 234 Here, we have presented a protocol for systematically conducting a scoping  
11  
12 235 review to broadly analyze the available evidence on the indications for and the  
13  
14 236 mechanisms of action, efficacy, and safety of JAK/STAT pathway-targeting  
15  
16  
17 237 drugs in the use of dermatological therapy. Evidence-based medicine is  
18  
19 238 intended to optimize decision-making by emphasizing the use of evidence  
20  
21 239 derived from well-designed and well-conducted research. Currently, most  
22  
23  
24 240 reviews of treatments blocking the JAK/STAT pathway are narrative reviews,  
25  
26 241 which lack the necessary methodological detail to promote reproducibility and  
27  
28 242 reduce the risk of bias.<sup>15,16</sup> Secondary research methodologies are constantly  
29  
30 243 being developed and must be adapted to the type of research question being  
31  
32  
33 244 asked and the urgency with which the question must be answered.<sup>17</sup>  
34  
35

36 245 Although we will try to analyse the quality of evidence per variable and disease  
37  
38 246 using GRADE approach, probably most of the studies have produced  
39  
40 247 documents communicating partial results following an observational design,  
41  
42  
43 248 which is associated with low or very low quality of evidence. However, we  
44  
45 249 believe that the scoping review methodology is the one of the best suited  
46  
47  
48 250 protocols to answer the question posed in this study. The results will provide  
49  
50 251 unique insights into the available evidence on the use of JAK/STAT pathway-  
51  
52 252 targeting drugs in the treatment of dermatological diseases, facilitating the  
53  
54 253 detection of knowledge gaps and the identification of new questions to address  
55  
56  
57 254 via additional systematic reviews.  
58  
59  
60

1  
2  
3  
4  
5 **255 ACKNOWLEDGEMENTS**  
6

7 **256 Funding.** This work was supported, in part, by project ICI1400136 (which  
8  
9  
10  
11  
12  
13  
14  
15  
16  
17  
18  
19  
20  
21  
22  
23  
24  
25  
26  
27  
28  
29  
30  
31  
32  
33  
34  
35  
36  
37  
38  
39  
40  
41  
42  
43  
44  
45  
46  
47  
48  
49  
50  
51  
52  
53  
54  
55  
56  
57  
58  
59  
60  
257 provided funding for J.R.), integrated into the National Plan of R+D+I 2008-  
258 2011, co-financed by the ISCIII-Subdireccion General de Evaluacion and  
259 European Regional Development Fund (ERDF), by project PIN-0316-2017-  
260 Consejeria de Salud-Junta de Andalucia (J.R.). No funding was obtained from  
261 any pharmaceutical company. The views expressed in this manuscript are  
262 those of the authors and do not necessarily represent the views of the funders.

263 **Authorship.** All named authors meet the International Committee of Medical  
264 Journal Editors (ICMJE) criteria for authorship for this article, take responsibility  
265 for the integrity of the work as a whole, and have given their approval for this  
266 version to be published. The authors are also grateful to the reviewers for their  
267 helpful comments and suggestions. We would also like to thank Editage  
268 (www.editage.com) for performing English-language editing of this review.

269 **Competing interests.** None declared.

270 **Provenance and peer review.** Not commissioned; externally peer reviewed.

271 **Compliance with Ethics Guidelines.** This protocol relates to a search for  
272 previously conducted studies, and does not involve any new human or animal  
273 subjects performed by the authors.

274 **Data sharing statement.** All the original data are presented in the text and  
275 tables of the protocol.

276 **Contributors.** FGG and JR conceived the study. FGG, PJGA, JH, AMM, JGM, MAL,  
277 IVG, AVGN, BIT, and JR contributed to the protocol design and plan. FGG, PJGA, and



1  
2  
3  
4  
5 278 JH developed the literature search strategy. All the authors worked collaboratively to  
6  
7  
8 279 draft and revise the manuscript, and read and approved the final version. All the authors  
9  
10 280 made substantive intellectual contributions to the development of this protocol. JR is the  
11  
12 281 guarantor of the review.  
13  
14

15 282 **Open Access.** This is an Open Access article distributed in accordance with the  
16  
17 283 Creative Commons Attribution Non Commercial (CC BY-NC 4.0) license, which  
18  
19 284 permits others to distribute, remix, adapt, build upon this work non-commercially, and  
20  
21 285 license their derivative works on different terms, provided the original work is properly  
22  
23 286 cited and the use is non-commercial.  
24  
25  
26  
27

28 287  
29  
30

31 288  
32  
33

34 289  
35  
36

37 290  
38  
39  
40  
41  
42  
43  
44  
45  
46  
47  
48  
49  
50  
51  
52  
53  
54  
55  
56  
57  
58  
59  
60

291 **REFERENCES**

- 292 1. Jason S. Rawlings, Kristin M. Rosler, Douglas A. Harrison, The JAK/STAT  
293 signaling pathway. *Journal of Cell Science* 2004;117:1281-1283.
- 294 2. Samadi A, Ahmad Nasrollahi S, Hashemi A, Nassiri Kashani M, Firooz A.  
295 Janus kinase (JAK) inhibitors for the treatment of skin and hair disorders: a  
296 review of literature. *J Dermatolog Treat* 2017;28:476-483.
- 297 3. Seavey MM, Dobrzanski P. The many faces of Janus kinase. *Biochem*  
298 *Pharmacol* 2012;83:1136-1145.
- 299 4. Schwartz DM, Bonelli M, Gadina M, O'Shea JJ. Type I/II cytokines, JAKs,  
300 and new strategies for treating autoimmune diseases. *Nat Rev*  
301 *Rheumatol* 2016;12:25-36.
- 302 5. Damsky W, King BA. JAK inhibitors in dermatology: The promise of a new  
303 drug class. *J Am Acad Dermatol* 2017;76:736-744.
- 304 6. Ghoreschi K, Jesson MI, Li X, et al. Modulation of innate and adaptive  
305 immune responses by tofacitinib (CP-690,550). *J Immunol* 2011;186:4234-4243.
- 306 7. Palanivel JA, Macbeth AE, Chetty NC, Levell NJ. An insight into JAK-STAT  
307 signalling in dermatology. *Clin Exp Dermatol* 2014;39:513-8.
- 308
- 309 8. Welsch K, Holstein J, Laurence A, Ghoreschi K. Targeting JAK/STAT  
310 signalling in inflammatory skin diseases with small molecule inhibitors. *Eur J*  
311 *Immunol* 2017;47:1096-1107.
- 312
- 313 9. [https://investor.incyte.com/news-releases/news-release-details/fda-approves-](https://investor.incyte.com/news-releases/news-release-details/fda-approves-incytes-jakafitm-ruxolitinib-patients-myelofibrosis)  
314 [incytes-jakafitm-ruxolitinib-patients-myelofibrosis](https://investor.incyte.com/news-releases/news-release-details/fda-approves-incytes-jakafitm-ruxolitinib-patients-myelofibrosis)
- 315
- 316 10. Traynor K. FDA approves tofacitinib for rheumatoid arthritis. *Am J Health*  
317 *Syst Pharm* 2012;69:2120.

318

- 1  
2  
3  
4  
5 319 11. Shreberk-Hassidim R, Ramot Y, Zlotogorski A. Janus kinase inhibitors in  
6 320 dermatology: A systematic review. *J Am Acad Dermatol* 2017;76:745-753.e19.  
7  
8 321  
9  
10 322 12. Colquhoun HL, Levac D, O'Brien KK, Straus S, Tricco AC, Perrier L,  
11 323 Kastner M and Moher D. Scoping reviews: time for clarity in definition, methods,  
12 324 and reporting. *Journal of Clinical Epidemiology* 2014;67:1291-1294.  
13  
14 325  
15  
16 326 13. The Joanna Briggs Institute. The Joanna Briggs Institute reviewer's  
17 327 manual 2015. <http://joannabriggs.org/assets/docs/sumari/Reviewers->  
18 328 [Manual\\_Methodology-for-JBI-Scoping-Reviews\\_2015\\_v2.pdf](http://joannabriggs.org/assets/docs/sumari/Reviewers-). Accessed 29  
19 329 Sept 2016.  
20  
21 330  
22  
23 331 14. Tricco AC, Lillie E, Zarin W, O'Brien KK, et al. PRISMA extension for  
24 332 scoping reviews (PRISMA ScR): checklist and explanation. *Ann Intern Med*  
25 333 2018;169:467-473.  
26 334  
27  
28 335 15. Yamaoka K, Saharinen P, Pesu M, Holt VE 3rd, Silvennoinen O, O'Shea JJ.  
29 336 The Janus kinases (Jaks). *Genome Biol* 2004;5:253.  
30 337  
31 338 16. O'Shea JJ, Schwartz DM, Villarino AV, et al. The JAK-STAT pathway:  
32 339 impact on human disease and therapeutic intervention. *Annu Rev Med*  
33 340 2015;66:311-28.  
34 341  
35 342 17. Moher D, Stewart L, Shekelle P. All in the family: systematic reviews, rapid  
36 343 reviews, scoping reviews, realist reviews, and more. *Syst Rev* 2015;22:183.  
37  
38  
39  
40  
41  
42  
43  
44  
45  
46  
47  
48  
49  
50  
51  
52  
53  
54  
55  
56  
57  
58  
59  
60

344 **TABLES**345 **Table 1. Stages of the scoping reviews.**

|                                 |                                      |                                                                                                                                                                                                               |
|---------------------------------|--------------------------------------|---------------------------------------------------------------------------------------------------------------------------------------------------------------------------------------------------------------|
| 1. Research Question Identified | 1.1. Overarching goal                | To explore the depth and breadth of evidence for the indications, epidemiology, genetics, efficacy and safety of drugs that act on JAK/STAT pathway in the treatment of patients with dermatological diseases |
|                                 | 1.2. Research question               | What are the indications, epidemiology, genetics, efficacy and safety of drugs that act on JAK/STAT pathway in the treatment of dermatological diseases?                                                      |
|                                 | 1.3. Purposes of this scoping review | 1.3.1. Review the evidence of indications for drugs that act on JAK/STAT pathway in the treatment of dermatological diseases                                                                                  |
|                                 |                                      | 1.3.2. Review the evidence of epidemiology of drugs acting on JAK/STAT pathway in the treatment of dermatological diseases                                                                                    |
|                                 |                                      | 1.3.3. Review the evidence of genetics of drugs acting on JAK/STAT pathway in the treatment of dermatological diseases                                                                                        |
|                                 |                                      | 1.3.4. Review the evidence on efficacy of the drugs that act on JAK/STAT pathway in the treatment of dermatological diseases                                                                                  |
|                                 |                                      | 1.3.5. Review the evidence on safety of drugs that act on JAK/STAT pathway in the treatment of dermatological diseases                                                                                        |

|                                           |                                                                                                                                                     |                                                                                                                                                                                                         |
|-------------------------------------------|-----------------------------------------------------------------------------------------------------------------------------------------------------|---------------------------------------------------------------------------------------------------------------------------------------------------------------------------------------------------------|
|                                           |                                                                                                                                                     | 1.3.6. Obtain concrete research questions that can be answered through a systematic review                                                                                                              |
|                                           |                                                                                                                                                     | 1.3.7. Identify research gaps in the existing literature                                                                                                                                                |
| <b>2. Identifying relevant literature</b> | 2.1. We will perform a three steps-search                                                                                                           | 2.1.1. First search: an initial limited search of the MEDLINE and EMBASE databases to find keywords in the title, abstract, and the index terms used to describe the articles                           |
|                                           |                                                                                                                                                     | 2.1.2. Second search: a search of MEDLINE and EMBASE using all identified keywords. <i>Additionally, CINAHL, Scopus, and Web of Science to the search engines will be searched in this second step.</i> |
|                                           |                                                                                                                                                     | 2.1.3. Third search: the reference lists of all identified reports and articles will be searched for additional studies                                                                                 |
|                                           | 2.2. We will include the studies published in full text in English until October 2018                                                               |                                                                                                                                                                                                         |
|                                           | 2.3. We will contact authors, of primary studies or reviews, for further information, if this is relevant                                           |                                                                                                                                                                                                         |
|                                           | 2.4. The search and selection will be done by at least two reviewers and in case of disagreement will be decided by agreement with a third reviewer |                                                                                                                                                                                                         |
| <b>3. Selecting studies</b>               | 3.1. Inclusion criteria                                                                                                                             | 3.1.1. We will include in the review the studies on the human use of drugs inhibitors of JAK/STAT pathway published on the topics: indications, epidemiology, genetics, efficacy, and safety.           |

1  
2  
3  
4  
5  
6  
7  
8  
9  
10  
11  
12  
13  
14  
15  
16  
17  
18  
19  
20  
21  
22  
23  
24  
25  
26  
27  
28  
29  
30  
31  
32  
33  
34  
35  
36  
37  
38  
39  
40  
41  
42  
43  
44  
45  
46

|                                                        |                                                                                                                                                                            |                                                                                                                                                                         |
|--------------------------------------------------------|----------------------------------------------------------------------------------------------------------------------------------------------------------------------------|-------------------------------------------------------------------------------------------------------------------------------------------------------------------------|
|                                                        |                                                                                                                                                                            | 3.1.2. Design of the studies: we will include guidelines, systematic reviews, randomized clinical trials, observational studies, cross sectional case report and series |
|                                                        | 3.2. Exclusion criteria                                                                                                                                                    | 3.2.1. We will exclude narrative reviews and studies performed <i>in vitro</i> or using animal models                                                                   |
| <b>4. Charting the data</b>                            | 4.1. We will extract the data in a predefined form.                                                                                                                        |                                                                                                                                                                         |
|                                                        | 4.2. From each study we will extract title, objective, main variables related to patients, intervention, comparator, outcomes (efficacy and safety) and bibliographic data |                                                                                                                                                                         |
|                                                        | 4.3. We will classify the studies by treatment indication                                                                                                                  |                                                                                                                                                                         |
|                                                        | 4.4. The list of studies, variables and data of there view will be published in an online-file                                                                             |                                                                                                                                                                         |
|                                                        | 4.5. The data collection will be done by at least two reviewers and in case of disagreement will be decided by agreement with a third reviewer                             |                                                                                                                                                                         |
| <b>5. Collating, summarizing and reporting results</b> | 5.1. The results of comprehensive search will be presented using the PRISMA flow diagram                                                                                   |                                                                                                                                                                         |
|                                                        | 5.2. We will synthesize qualitatively the evidence obtained ordering it by topics: indications, mechanism of action, efficacy and safety of drugs that act on              |                                                                                                                                                                         |

|                                                             |                                                                                                                                          |  |
|-------------------------------------------------------------|------------------------------------------------------------------------------------------------------------------------------------------|--|
|                                                             | JAK/STAT pathway to treat dermatological diseases and we will present it in a diagrammatic tabular form and in a descriptive format      |  |
|                                                             | 5.3. We will use the extension of PRISMA for scoping review for the notification of the review                                           |  |
| <b>6. Differences between the protocol and the overview</b> | Any changes in the methodology that need to be carried out through out the study will be detailed together with the results publication. |  |

17 346

20 347

22 348

1  
2 349  
3 350  
4 351  
5 352  
6 353  
7

**Table 2. Draft of first step of search strategy to be used for at least two electronic databases.**

**MEDLINE (Ovid), Embase (Ovid)**

| search |                                                                                                                                                                                                                                                                                                                                                                                                                                                                                                                                                                                                                                                                                                                                                                                                                                                                                                                                                                                                                   |
|--------|-------------------------------------------------------------------------------------------------------------------------------------------------------------------------------------------------------------------------------------------------------------------------------------------------------------------------------------------------------------------------------------------------------------------------------------------------------------------------------------------------------------------------------------------------------------------------------------------------------------------------------------------------------------------------------------------------------------------------------------------------------------------------------------------------------------------------------------------------------------------------------------------------------------------------------------------------------------------------------------------------------------------|
| #1     | (('tofacitinib' OR 'baricitinib' OR 'ruxolitinib' OR 'oclacitinib' OR 'upadacitinib' OR 'delgocitinib' OR 'itacitinib' OR 'momelotinib' OR peficitinib OR 'decernotinib' OR 'fedratinib' OR 'pacritinib' OR 'filgotinib' OR 'gandotinib' OR 'solcitinib' OR 'lestaurtinib' OR 'janus kinase inhibitor')                                                                                                                                                                                                                                                                                                                                                                                                                                                                                                                                                                                                                                                                                                           |
| #2     | (('psoriasis'/exp OR psoriasis) OR 'atopic dermatitis' OR 'alopecia' OR 'contact dermatitis' OR 'vitiligo' OR 'graft versus host reaction' OR 'lichen planus' OR 'pyoderma gangrenosum' OR 'pruritus' OR (eosinofilic AND annulare AND erythema) OR 'male type alopecia' OR 'proteasome associated autoinflammatory syndrome' OR 'sting associated vasculopathy with onset in infancy' OR 'chronic atypical neutrophilic dermatosis with lipodystrophy and elevated temperature syndrome' OR 'hand dermatitis' OR 'discoid lupus erythematosus' OR 'mucocutaneous candidiasis' OR (urticaria AND chronic) OR 'suppurative hidradenitis' OR 'melanoma' OR 'non melanoma skin cancer' OR 'acne' OR 'lichen sclerosus et atrophicus' OR 'pityriasis rubra pilaris' OR 'pemphigus' OR 'skin disease' OR 'rosaceae' OR 'scleroderma' OR 'cinca syndrome' OR 'hyperhidrosis' OR 'erythropoietic protoporphyria' OR 'anca associated vasculitis' OR 'seborrheic dermatitis' OR 'herpes simplex' OR 'sjoegren syndrome')) |
| #3     | #1 AND #2                                                                                                                                                                                                                                                                                                                                                                                                                                                                                                                                                                                                                                                                                                                                                                                                                                                                                                                                                                                                         |

22 354  
23  
24 355  
25  
26  
27 356  
28  
29 357  
30 358  
31  
32  
33  
34  
35  
36  
37  
38  
39  
40  
41  
42  
43  
44  
45  
46



**PRISMA-P (Preferred Reporting Items for Systematic review and Meta-Analysis Protocols) 2015 checklist: recommended items to address in a systematic review protocol\***

| Section and topic                 | Item No | Checklist item                                                                                                                                                                                                                | (Page No.#) |
|-----------------------------------|---------|-------------------------------------------------------------------------------------------------------------------------------------------------------------------------------------------------------------------------------|-------------|
| <b>ADMINISTRATIVE INFORMATION</b> |         |                                                                                                                                                                                                                               |             |
| Title:                            |         | <b>Drugs targeting the JAK/STAT pathway for the treatment of immune-mediated inflammatory skin diseases: protocol for a scoping review</b>                                                                                    |             |
| Identification                    | 1a      | Identify the report as a protocol of a systematic review                                                                                                                                                                      | 1           |
| Update                            | 1b      | If the protocol is for an update of a previous systematic review, identify as such                                                                                                                                            | NA          |
| Registration                      | 2       | If registered, provide the name of the registry (such as PROSPERO) and registration number                                                                                                                                    | NA          |
| Authors:                          |         |                                                                                                                                                                                                                               |             |
| Contact                           | 3a      | Provide name, institutional affiliation, e-mail address of all protocol authors; provide physical mailing address of corresponding author                                                                                     | 1-2         |
| Contributions                     | 3b      | Describe contributions of protocol authors and identify the guarantor of the review                                                                                                                                           | 10          |
| Amendments                        | 4       | If the protocol represents an amendment of a previously completed or published protocol, identify as such and list changes; otherwise, state plan for documenting important protocol amendments                               | 13,14       |
| Support:                          |         |                                                                                                                                                                                                                               |             |
| Sources                           | 5a      | Indicate sources of financial or other support for the review                                                                                                                                                                 | 13          |
| Sponsor                           | 5b      | Provide name for the review funder and/or sponsor                                                                                                                                                                             | 13          |
| Role of sponsor or funder         | 5c      | Describe roles of funder(s), sponsor(s), and/or institution(s), if any, in developing the protocol                                                                                                                            | 13          |
| <b>INTRODUCTION</b>               |         |                                                                                                                                                                                                                               |             |
| Rationale                         | 6       | Describe the rationale for the review in the context of what is already known                                                                                                                                                 | 5-7         |
| Objectives                        | 7       | Provide an explicit statement of the question(s) the review will address with reference to participants, interventions, comparators, and outcomes (PICO)                                                                      | 8           |
| <b>METHODS</b>                    |         |                                                                                                                                                                                                                               |             |
| Eligibility criteria              | 8       | Specify the study characteristics (such as PICO, study design, setting, time frame) and report characteristics (such as years considered, language, publication status) to be used as criteria for eligibility for the review | 4-5         |
| Information sources               | 9       | Describe all intended information sources (such as electronic databases, contact with study authors, trial registers or other grey literature sources) with planned dates of coverage                                         | 9-11        |
| Search strategy                   | 10      | Present draft of search strategy to be used for at least one electronic database, including planned limits, such that it could be                                                                                             | Table 2     |

|                                    |     |                                                                                                                                                                                                                                                     |             |
|------------------------------------|-----|-----------------------------------------------------------------------------------------------------------------------------------------------------------------------------------------------------------------------------------------------------|-------------|
|                                    |     | repeated                                                                                                                                                                                                                                            |             |
| Study records:                     |     |                                                                                                                                                                                                                                                     |             |
| Data management                    | 11a | Describe the mechanism(s) that will be used to manage records and data throughout the review                                                                                                                                                        | 10-11       |
| Selection process                  | 11b | State the process that will be used for selecting studies (such as two independent reviewers) through each phase of the review (that is, screening, eligibility and inclusion in meta-analysis)                                                     | 10          |
| Data collection process            | 11c | Describe planned method of extracting data from reports (such as piloting forms, done independently, in duplicate), any processes for obtaining and confirming data from investigators                                                              | 10          |
| Data items                         | 12  | List and define all variables for which data will be sought (such as PICO items, funding sources), any pre-planned data assumptions and simplifications                                                                                             | 10-11       |
| Outcomes and prioritization        | 13  | List and define all outcomes for which data will be sought, including prioritization of main and additional outcomes, with rationale                                                                                                                | 11          |
| Risk of bias in individual studies | 14  | Describe anticipated methods for assessing risk of bias of individual studies, including whether this will be done at the outcome or study level, or both; state how this information will be used in data synthesis                                | NA          |
| Data synthesis                     | 15a | Describe criteria under which study data will be quantitatively synthesised                                                                                                                                                                         | NA/11/NA/11 |
|                                    | 15b | If data are appropriate for quantitative synthesis, describe planned summary measures, methods of handling data and methods of combining data from studies, including any planned exploration of consistency (such as I <sup>2</sup> , Kendall's τ) |             |
|                                    | 15c | Describe any proposed additional analyses (such as sensitivity or subgroup analyses, meta-regression)                                                                                                                                               |             |
|                                    | 15d | If quantitative synthesis is not appropriate, describe the type of summary planned                                                                                                                                                                  |             |
| Meta-bias(es)                      | 16  | Specify any planned assessment of meta-bias(es) (such as publication bias across studies, selective reporting within studies)                                                                                                                       | 11          |
| Confidence in cumulative evidence  | 17  | Describe how the strength of the body of evidence will be assessed (such as GRADE)                                                                                                                                                                  | 11          |

**\*It is strongly recommended that this checklist be read in conjunction with the PRISMA-P Explanation and Elaboration (cite when available) for important clarification on the items. Amendments to a review protocol should be tracked and dated. The copyright for PRISMA-P (including checklist) is held by the PRISMA-P Group and is distributed under a Creative Commons Attribution Licence 4.0.**

*From: Shamseer L, Moher D, Clarke M, Ghersi D, Liberati A, Petticrew M, Shekelle P, Stewart L, PRISMA-P Group. Preferred reporting items for systematic review and meta-analysis protocols (PRISMA-P) 2015: elaboration and explanation. BMJ. 2015 Jan 2;349(jan02 1):g7647.*
